# Microfluidic-based imaging of complete *C. elegans* larval development

Simon Berger<sup>1,2,°</sup>, Silvan Spiri<sup>1</sup>, Andrew deMello<sup>2</sup> and Alex Hajnal<sup>1</sup>

<sup>1</sup> Department of Molecular Life Science, University Zürich, Winterthurerstrasse 190, 8057 Zürich

<sup>2</sup> Institute for Chemical- and Bioengineering, ETH Zürich, 8093 Zürich

<sup>°</sup>Corresponding author: [simon.berger@mls.uzh.ch](mailto:simon.berger@mls.uzh.ch)

Key words: Microfluidics, Imaging, Long-term, *C. elegans*, Development

## Abstract

Several microfluidic-based methods for *C. elegans* imaging have recently been introduced. Existing methods either permit imaging across multiple larval stages without maintaining a stable worm orientation, or allow for very good immobilization but are only suitable for shorter experiments. Here, we present a novel microfluidic imaging method, which allows parallel live-imaging across multiple larval stages, while maintaining worm orientation and identity over time. This is achieved through an array of microfluidic trap channels carefully tuned to maintain worms in a stable orientation, while allowing growth and molting to occur. Immobilization is supported by an active hydraulic valve, which presses worms onto the cover glass during image acquisition only. In this way, excellent quality images can be acquired with minimal impact on worm viability or developmental timing. The capabilities of the devices are demonstrated by observing the hypodermal seam and P cell divisions and, for the first time, the entire process of vulval development from induction to the end of morphogenesis. Moreover, we demonstrate feasibility of on-chip RNAi by perturbing basement membrane breaching during anchor cell invasion.

## Introduction

Traditionally, immobilization of *C. elegans* larvae and adults during image acquisition is accomplished using agar pads, a simple construct consisting of a glass slide and a thin slab of agar onto which individual worms are placed (Luke *et al.* 2014, Goodman *et al.* 1998). Immobilization is achieved by placing the cover glass on top of the agar pad and further improved using anesthetics such as levamisole or sodium azide (Sulston *et al.* 1977, Sulston *et al.* 1983). Whilst simple to fabricate, agar pad immobilization is invasive and results in a slowdown or complete arrest of development, precluding long-term observation (Fang-Yen *et al.* 2012, Wolke *et al.* 2007).

In recent years, a number of microfluidic approaches for *C. elegans* imaging have been reported (Chronis *et al.* 2007, Hulme *et al.* 2007, Rohde *et al.* 2007, Chung *et al.* 2008, Hulme *et al.* 2010, Krajniak *et al.* 2010, Samara *et al.* 2010, Stirman *et al.* 2010, San-Miguel *et al.* 2013, Lee *et al.* 2014, Mondal *et al.* 2016,). For example, Gritti *et al.* demonstrated a method in which worms are confined to large chambers (Gritti *et al.* 2016). Embryos placed in these chambers will develop and move freely, never leaving the region of interest set on the microscope. As animals are unrestrained, bodily motion is compensated by acquiring fluorescence images at high speed. Although broadly successful, the approach is limited to the assessment of bright fluorescent markers. More recently, Keil *et al.* presented a variation on this theme (Keil *et al.* 2017). Here, worms are confined to large microfluidic chambers and free to move for most of the experiment. Only during image acquisition are worms immobilized; in this case using an inflatable hydraulic valve placed on top of the device that confines worms to the edge of the trap chamber upon actuation. As worms are immobilized in a secure fashion, a large variety of fluorescent markers and exposure times can be used. Such an approach is flexible, minimizes any negative effects on the animal and allows the study of development across all larval stages. Parallelization of experiments in either approach is achieved by fabricating multiple trap chambers on a single device, and sequentially imaging these throughout the experiment. However, as both of these approaches maintain worms in chambers significantly larger than the trapped worms, animals will move and rotate throughout the experiment, significantly hampering the tracking of many processes, and necessitating extensive post processing to compensate for animal motion. Lastly, Gokce *et al.* introduced a different approach for parallel long-term immobilization (Gokce *et al.* 2017). Here, a large number of worms are maintained in a large chamber for most of the experiment, allowing unhindered feeding and growth. During image acquisition, worms are pushed from the main

chamber into an array of tapered channels, mechanically immobilized and imaged. Here parallelization is not achieved using multiple separate devices, but rather by using a number of parallel trap channels within a single device. Such an approach significantly simplifies device setup and operation, however repeatedly releasing worms from the trap channels into the large chamber does result in loss of animal identity as well as orientation. This in turn makes tracking developmental processes in the same worm impossible.

To address these limitations, we present a set of microfluidic devices that use “gentle” worm immobilization, therefore guaranteeing reliable development, whilst still allowing for high-resolution imaging and preservation of the orientation and identity of animals throughout an experiment. A first generation immobilization device, we introduced in 2018, allowed for the imaging of adult *C. elegans* under physiological conditions (Berger *et al.* 2018). Here, worms were trapped between two sets of on-chip hydraulic valves, confining the animal to the imaging area, while constantly supplying a bacterial food suspension and allowing egg laying through a set of pillars, placed next to a trapped animal’s vulva. Animals confined in this manner, on average remained viable for 100 hours, and could be imaged at high resolution using a variety of different imaging modalities. Furthermore, devices could be scaled to accommodate larvae at different stages, delivering the same advantages and performance as observed in adult *C. elegans*. However, this immobilization approach suffered from two drawbacks. First, parallelization of experiments was difficult due to the intricate channel system necessary to allow food supply and worm trapping, and second, *C. elegans* larvae could only be observed through a single larval stage at the end of which development arrested, as immobilized animals were unable to molt. We therefore developed a new generation of immobilization devices, which like the first generation devices preserve animal orientation and identity throughout an experiment and allow acquisition of high-resolution images, but allow imaging of multiple worms in parallel, as well as observation of worm development across multiple larval stages within a single device.

## Results

### Device Design and Function

Akin to the long-term immobilization approach proposed by Gokce *et al.* (Gokce *et al.* 2017), we performed long-term imaging using a parallel array of trap channels, rather than multiple individual trap chambers. In contrast to the approach by Gokce *et al.* (Gokce *et al.* 2017), we main-

tained the animals in the trap channels for the entire duration of the experiment, preserving worm identity and orientation. We developed three separate devices designed to cover all four larval stages. These devices are denominated as L1 for L1 larvae loaded right after hatching and imaged until the L2 stage; L1-L4 which can hold larvae from the mid to late L1 stage up to early/mid L4 stage; and lastly L2-A which can hold animals from approximately the mid L2 stage up to young adulthood. In all three devices, worms are trapped in up to 41 identical channels, which have a constant cross-section along the entire length, with only a slight taper at the head and a narrowing at the tail region of the channel (**Fig. 1A-A',C**). Channel dimensions were chosen to be significantly longer and wider than the worms loaded at the beginning of an experiment, with a length/width of 400/15  $\mu\text{m}$  for L1 devices, 575/22  $\mu\text{m}$  for L1-L4 devices and 800/27  $\mu\text{m}$  for L2-A devices respectively (**Fig. 1C**). Channel length was chosen similar to the size the animals reached at the end of an experiment and width was chosen such that animals at the beginning of an experiment would fill about two thirds of the channel width. In this way, worms have sufficient space to grow, as well as move to shed their skin during molting, but are prevented from turning or rotating. Channel height, unlike width, was chosen to be close to the thickness of the worms at the beginning of an experiment, i.e. 8  $\mu\text{m}$  for early L1 larvae, 12  $\mu\text{m}$  for mid/late L1 larvae and 15  $\mu\text{m}$  for mid L2 larvae, in the L1, L1-L4 and L2-A devices, respectively. The reduced device height along with a carefully chosen device width (ratio of 0.5-0.6 H/W) keeps worms in a fixed orientation. Importantly, with a sufficiently small device height all worms are oriented and maintained in the desired lateral orientation. These stage-specific geometric constraints, necessary to prevent worms from rotating or turning head to tail, are the reason why three separate device types are needed to cover all larval stages. L1 larvae loaded into a channel large enough for young adult animals would simply not remain stable, and quickly leave the trap channel.

Food is supplied through an additional channel, which connects to the tip of each trap channel through a lower height section, i.e. a channel spanning the width of the device, with a significantly lower height than the trap region of the device (**Fig. 1A,A', red**). The height of this connecting channel was chosen to be 4  $\mu\text{m}$  for the L1 device and 5  $\mu\text{m}$  for the L1-L4 and L2-A devices; large enough for bacteria to flow through unhindered and for the worms to reach the supplied food, but small enough to ensure that worms do not slip from the trap channel into the adjacent channel. Indeed, worms are trapped at the end of each channel not by a change in channel width,



but by the sudden change in channel height at the transition from the trap channel to the food supply channel. All trapped worms passively remain at the tip of the trap channel within the designated imaging area (**Fig. 1A'**). L1 larvae were typically oriented in an oblique fashion, while L2 and older larvae remained on their lateral sides as on agar plates. It should be noted that whilst all 41 channels can be filled simultaneously with animals, not all worms will be facing the food supply channel. Only worms facing the food supply channel will be able to feed and develop normally, while worms facing away from the food supply will develop at a slower rate, especially toward the end of an experiment. Care must therefore be taken to load worms in a “head first” orientation, through careful manipulation during device loading. In the experiments presented herein, a total of 187 worms were imaged. Of these 159 (85%) were oriented correctly with the head facing the food source and only 28 (15%) were oriented incorrectly.

As worms are maintained in channels that are too large for passive immobilization, additional active immobilization measures were implemented using a large inflatable hydraulic valve fabricated on top of the array of parallel trap channels. Inflating this hydraulic valve results in a downward force that presses trapped animals onto the cover glass and minimizing animal motion (**Fig. 1B**). The hydraulic valve is only inflated during image acquisition, such that worms remain nearly free for most of the experiment. It should, however, be noted that even when the hydraulic valve is actuated animals are not completely immobile. Especially, head and tail remain less immobile due to their tapered shape and to pharyngeal pumping. This residual motion may be remedied by applying higher pressure, though we found that application of excessive pressure might negatively affect developmental speed. Worms trapped in our devices and compressed with a pressure of 10-15 psi remained stable enough for acquisition of high-resolution images, suitable for long-term tracking and even 3D reconstruction of developing features of interest (**Movie S1**). The extent of residual motion within a single stack will depend on several factors, specifically the employed exposure time and overall acquisition speed of the used microscope system. Owing to the high acquisition speed the microscopes used in this study offer, and the generally good brightness of the markers used, we observed motion only in a few time points, with features most typically not moving and only very rarely moving over larger distances (25-50  $\mu\text{m}$ ) in a single stack. Motion within a stack should remain minimal even when using longer exposure times or slower (e.g. confocal) microscope systems, and not pose an issue, especially when 3D reconstruction is not required. Motion within stacks and in between stacks is essentially linear along

the length of the trap channel, with features of interest shifting as worms grow in size (**Movie S2**). This linear motion can be compensated for through automated or manual image registration. This greatly simplifies the tracking of processes, especially when compared to other microfluidic methods, which deal with large shifts in animal position and require computational straightening of features of interest. For all images shown in this study, no registration was applied. Image quality is unaffected by the microfluidic device itself, since these are fabricated on a cover glass and made from an optically transparent elastomer. Indeed, devices are inherently compatible with high magnification, high NA immersion objectives, with no noticeable deterioration in image quality.

Parallelization is achieved by spacing the trap channels such that multiple animals can be imaged at the same time. Channel spacing was chosen such that in the field of view of a sCMOS camera with a 18.7mm diagonal chip area, at 100X magnification three, at 60X five and at 40X seven animals can be simultaneously imaged in a single region of interest (**Fig. 1A'**). Throughput can be further increased using a motorized XY-stage to acquire multiple regions of interest within the same microfluidic device, generating a throughput equal to or higher than other published systems.

### Development On-Chip

On-chip developmental timing was established by following the seam cell divisions, which occur at the beginning of each larval stage, using the three separate devices for L1, L1-L4 and L2-adulthood (**Fig. 2**). The hypodermis was visualized using a DLG-1::GFP marker (*dlg-1(mc103[dlg-1::gfp])*) (Vuong-Brender *et al.* 2017) in experiments with the L1 device and a HMR-1::GFP adherens junction marker (*cp21*) (Marston *et al.* 2016) in experiments with all other devices. Both markers outline all seam cells as well as the P-cells and at later stages also the vulval precursor cells (VPCs). The DLG-1::GFP marker was used in experiments with L1 larvae since HMR-1::GFP shows a very low signal to noise ratio at this stage, making it difficult to identify individual cells with this marker.

Developmental timing for the L1 devices was assessed from the start of an experiment (time zero) up to the L2 stage. Several milestones were assessed in timing and reproducibility studies. These included the time by which all seam cells had finished their respective divisions and reconnected to their neighbors, the end of all ventral P-cell migrations and divisions in the L1

stage, as well as the time at which the first seam cell divided in the L2 stage (**Fig. 2A**). All seam cells reconnected to their neighbors after  $12.0 \pm 1.7$  hours in L1 ( $n=22$ ), and P-cells had concluded their ventral migration and divided along the A-P axis after  $14.9 \pm 1.4$  hours ( $n=22$ ).

The first seam cell division in L2 was typically observed after  $21.16 \pm 3.5$  hours ( $n=20$ ) and completion of all L2 divisions after another  $12.9 \pm 4.0$  hours ( $n=12$ ). These data indicated that the time in which these processes occur is highly reproducible. Developmental timing, especially early on during development, i.e. seam cell divisions and fusion to the hypodermis occur at timing consistent with literature values (Sulston *et al.* 1983, Podbilewicz *et al.* 1994). However, the start of seam cell division in the L2 stage appeared to be delayed and more variable. This delay may result from one of two factors, delayed exit from overnight starvation or the small size of the trap channel needed to properly orient early L1 larvae at the start of the recording, with the narrow confinement possibly impeding the L1/L2 molting. Nonetheless, using the L1 device all imaged animals developed through the L1 stage. Whilst not recommended due to possible molting delays, development in the early L2 stage can still be assessed using this device.

For the L1-L4 and L2-A devices, we likewise quantified developmental timing using the time at which the first seam cell initiates a new round of division indicating the end of the previous larval stage and the start of a new one. The length of L2 and L3 were  $10.2 \pm 1.0$  and  $10.9 \pm 1.4$  hours, respectively ( $n=27$ ) using the L1-L4 device (**Fig. 2B**), and for L3 and L4 the time was  $10.4 \pm 2.3$  and  $14.6 \pm 2.2$  hours respectively ( $n=19$ ), using the L2-A device (**Fig. 2C**). The end of L4 stage was not defined as the moment when seam cells fuse (which happened on average after  $5.7 \pm 1.3$  hours,  $n=19$ ), but as the time when vulval eversion is completed, indicating the end of vulval development. All animals imaged in the L1-L4 and L2-A devices reached the L4 stage and adulthood, respectively. For the L2-A device it should be noted that development does not immediately arrest in early adulthood, with adult worms remaining viable for several more hours, with multiple ovulation events being observed in trapped animals.

Comparison to worms grown on NGM plates under standard conditions yielded median developmental times for L1 15 hours ( $n=21$ ), L2 10 hours ( $n=46$ ) for the DLG-1::GFP strain, for the HMR-1::GFP strain we found the following values L2 10 hours ( $n=15$ ), L3 12 hours ( $n=21$ ) and L4 12.5 hours ( $n=61$ ) (**Fig. S1**). These data indicate that development on NGM plates occurs slightly faster than on-chip, especially in L1 larvae and during the L4 stage. This is most likely caused by the low channel height, which over time compresses the growing worms and results in

a delay in developmental speed. On-chip developmental timing may additionally be affected by image acquisition itself. Long exposure times and high excitation intensities may not only result in photobleaching and loss of signal, but also have phototoxic effects resulting in developmental delay or arrest. Care must therefore be taken to choose suitable imaging parameters.

### Post-embryonic development of the hypodermis

Using the smallest (L1) of our three devices, we studied the development of the hypodermis, specifically assessing seam cell and P-cell division and migration. Our aim was to gain insights into the variability of developmental timing, which cannot be accessed by imaging single animals on agar pads. Seam cells divide in a fixed pattern during all four larval stages. Their divisions are asymmetric, with the posterior of the two daughter cells normally remaining as a seam stem cell and the anterior fusing with the surrounding hypodermis (**Fig. 3A**) (Hedgecock *et al.* 1985, Austin *et al.* 1994). The P-cells are initially connected to neighboring seam cells, forming pairs along the A-P axis (Sultson *et al.* 1977, Hedgecock *et al.* 1987). Over the course of the L1 stage, the P-cells detach from the seam cells, migrate towards the ventral midline and divide, with the posterior daughter cells of P1, P2 and P9-P11 (the Pn.p cells) fusing to hyp7 and the anterior Pn.a cells differentiating into ventral cord motor neurons. The central Pn.p cells P3-8.p remain unfused and become the VPCs (except for P3.p, which fuses later during L2 in around 50% of the cases) (Sulston *et al.* 1983, Wang *et al.* 1993).

Using our L1 device, we were able to image worms loaded immediately after hatching and until the early L2 stage. Images were acquired at 15-minute intervals, which are short enough to observe all individual cell divisions and long enough for imaging not to affect normal development. We were able to identify and follow all seam cells (**Fig. 3A-C, Movie S2**), except for those originating from the tail cell, which were typically obstructed in the oblique orientation of L1 larvae. All seam cells imaged on-chip followed the same pattern of asymmetric cell divisions, indicating that the microfluidic device does not affect the process ( $n=12$ ). As previously described by Podbilewicz *et al.* (1994), the first seam cell, typically V5, followed by V3, divides after  $4.82 \pm 0.62$  hours with H1 and H2 dividing 3.48 and 2.77 hours later respectively (**Fig. 3B**). The last division during this first round of cell divisions typically occurred after  $8.30 \pm 1.16$  hours. A similar pattern was observed for the times at which daughter seam cells fuse with hyp7, except that V3 and V4 were often the first cells to fuse even though they are not necessarily the first ones to divide

(**Fig. 3C**). Cells typically fused  $3.98 \pm 0.76$  hours after they were formed ( $n=12$ ). Similarly, we could identify all 12 P-cells and follow their migration toward the ventral midline and divisions into the Pn.a and Pn.p cells (**Fig. 3D**). Before migrating ventrally, the pairs of P-cells rotated by  $90^\circ$  to align along the A-P axis (Podbilewicz *et al.* 1994). On average, P-cells began division after  $11.7 \pm 1.6$  hours ( $n=12$ ) and the fusions of their daughter cells was completed after  $15.9 \pm 2.7$  hours ( $n=12$ ) at the end of the L1 stage. These observations are in good agreement with developmental timing found in worms developing on NGM plates and literature values. However, as noted on general developmental timing a slight decrease in developmental state toward the end of the L1 stage is apparent. In free crawling worms, we observed the first seam cell division after a median of 4.5 hours ( $n=20$ ), with all divisions completed after a median of 7.5 hours ( $n=18$ ), and fusion of the anterior daughters was typically completed 3-3.5 hours after seeding ( $n=44$ ). P-cell migration and fusion off-chip were completed after 9.5 hours ( $n=15$ ) and 13 hours ( $n=23$ ) respectively. Likewise, Podbilewicz *et al.* (1994) found the first seam cell division occurred 5 hours after hatching, with the last occurring after 7.5-8.5 hours, and fusion of the anterior daughter cells typically occurring 3 hours after formation. Importantly, images acquired on chip were of excellent quality, allowing identification and tracking of all GFP-labelled cells of interest in 3D reconstructions (**Movie S3**).

### Observing VPC induction

The second device type, L1-L4, was tested by observing vulval induction. The development of the hermaphrodite vulva is one of the best-studied models for organogenesis, as many mutants have been isolated that affect various aspects of the process (Greenwald *et al.* 1983, Sternberg *et al.* 1986, Sternberg *et al.* 1989, Sternberg *et al.* 2005). During the L2 stage, three of the six VPCs (P5.p, P6.p and P7.p) are induced to adopt one of two vulval cell fates ( $1^\circ$  or  $2^\circ$  fate). VPC fate specification occurs through a combination of an inductive epidermal growth factor (EGF) signal, secreted by the gonadal anchor cell (AC), together with lateral Delta/Notch signaling among the VPCs. In wild type animals, the AC is situated closest to P6.p. Thus, P6.p receives the highest amount of inductive EGF signal, which specifies the  $1^\circ$  fate by activating the EGFR/RAS/MAPK signaling pathway. The adjacent VPCs P5.p and P7.p receive less inductive signal and acquire the  $2^\circ$  vulval fate due to the activation of the lateral Notch signaling pathway. The three remaining VPCs (P3.p, P4.p and P8.p) receive only little inductive and lateral signal

and adopt the non-vulval 3° fate by dividing once and then fusing with hyp7. Following its induction, P6.p divides thrice to generate 8 descendants, while its neighbors P5.p and P7.p generate 7 descendants in an asymmetric lineage. After the three rounds of vulval cell divisions have been completed by the end of the L3/beginning of the L4 stage, a total of 22 vulval cells have been generated.

We observed the specification of the 1° cell fate using the *arl92[egl-17::cfp]* transcriptional reporter (**Fig. 4A, Movie S4**) (Yoo *et al.* 2004). In animals recorded from the late L1 stage onwards, weak EGL-17::CFP expression first became apparent during the early L2 stage (**Fig. 4A,B**). At this stage, EGL-17::CFP-fluorescence could not only be observed in P6.p, may also be observed in the neighboring VPCs (**Fig. 4A,B**). Only towards the end of the L2 stage, when P6.p has irreversibly been determined as the 1° VPC, the other VPCs ceased expression of the 1° fate marker (**Fig. 4A,B**). Once the 1° fate had been established, EGL-17::CFP expression further increased in P6.p, and during the subsequent VPC divisions EGL-17::CFP remained highly expressed in the P6.p descendants (**Fig.4A,C**). The first VPC division was observed  $14.26 \pm 2.47$  hours after experiment begin (approximately 30 hours after seeding), with the second occurring  $1.46 \pm 0.13$  hours later ( $n=19$ ). These data are in good agreement with literature values established on NGM plates (Nusser- Stein *et al.* 2012, Euling and Ambros 1996), Euling and Ambros found the first division to occur after approximately 29 hours and the second approximately 3 hours later (Euling and Ambros 1996). Along with EGL-17::CFP fluorescence, we quantified gonad length as an accurate measure of the developmental stage (**Fig.4D**) (Mereu *et al* 2020). Especially during the L2 and early L3 stages, gonad length increased linearly and relatively uniformly in the imaged worm population ( $n=19$ ), indicating reliable on-chip development. The variation in gonad length increased toward the end of the L3 stage, as part of the gonads became obscured by the intestine. EGL-17::CFP fluorescence intensity in P6.p and its descendants was quantified for each worm over time, revealing a relatively slow intensity increase throughout the L2 stage, followed by a more rapid increase during the L3 stage. Interestingly, the EGL-17::CFP signals varied greatly from animal to animal, even after the 1° fate had been established in late L2 (**Fig. 4E**), reflecting the dynamic and initially variable nature of vulval induction within an isogenic population of animals.

In summary, these experiments show the suitability of our L1-L4 device in imaging VPC induction and the possibility of quantifying gene expression levels based on fluorescent reporters at high temporal resolution.

### Live-imaging vulval morphogenesis

The capabilities of the third set of devices (L2-A), were assessed by imaging the entire process of vulval development until the completion of vulval morphogenesis (Newman *et al.* 1996, Schmid *et al.* 2015, Schindler *et al.* 2013, Sharma-Kishore *et al.* 1999). As with the seam cell divisions, the formation of the vulva occurs in a stereotypical fashion with the formation of different structures that can be used to track the reliability and test for normal developmental progression. After the induction of the three VPCs at the late L2/early L3 stage, three rounds of cell divisions yield a total of 22 vulval cells by the end of the L3 stage. During the L4 stage, epithelial morphogenesis gives rise to the complete vulva. The 22 vulval cells invaginate to form a ventral lumen and extend circumferential processes that fuse with their contralateral partner cells, thereby forming a stack of seven toroids that build the tubular organ. Finally, by the end of the L4 stage, the vulval toroids are connected to the uterus and eversion of the vulva closes the lumen.

We imaged vulval development from the early L3 stage onwards, visualizing all cell divisions and the entire process of morphogenesis using the HMR-1::GFP adherens junction marker described above. Additionally, the AC was labelled with the *Pcdh-3>mCherry::moeABD (qyIs50)* reporter, as the AC plays key roles during vulval induction and morphogenesis. Using these two markers, we were able to visualize the divisions, migrations, invasion, fusions and shape changes of the 22 vulval cells during the L3 and L4 stages with excellent spatial and temporal resolution, allowing us to obtain 3D reconstructions of the process (**Fig. 5A-A''**, **Movie S5**). As with the other processes studied, we ensured that imaging in the microfluidic device does not affect development in morphology or speed. To this end, we assessed the time needed to progress from invagination (L4.0, *t1*) to the mid L4 stage (L4.5, *t4*) according to the sub-stages defined by Mok *et al.* (Mok *et al.* 2015) (**Fig. 5B,C**). The average progression time between *t1-t2* was  $3.8 \pm 1.2$  hours, between *t2-t3*  $3.5 \pm 1.2$  hours and between *t3-t4*  $2.8 \pm 1.6$  hours ( $n=7$ ), indicating an approximately linear developmental progression (**Fig. 5C**). Like in the developmental timing assay these times, especially *t1-t2*, appear slightly delayed when compared to literature values (*t1-t2*



0.7 hours, t2-t3 3 hours, t3-t4 2.3 hours; Mok *et al.* 2015), which may stem from the narrow dimensions of the device delaying molting. Nonetheless, developmental timing within the animals we assessed is highly reproducible and all animals completed development into adulthood. We then proceeded to measure multiple features of the toroids at selected time points (M1-M5 in **Fig. 5B**), with the variation in measurement again serving as an indication of developmental consistency. The measurements of the selected features exhibited little variation between animals (**Fig. 5D**, M1  $7.64 \pm 0.54 \mu\text{m}$ ; M2  $4.39 \pm 0.56 \mu\text{m}$ ; M3  $6.02 \pm 0.45 \mu\text{m}$ ; M4  $13.80 \pm 0.56 \mu\text{m}$ ; M5  $54.71 \pm 4.36 \mu\text{m}$ ,  $n=7$ ). Together, these measurements indicate that our microfluidic devices do not significantly affect developmental patterns or reliability. Furthermore, as shown in **Fig. 5A,B** our microfluidic imaging method combined with standard image deconvolution methods delivers high image quality, enabling us to identify and track individual cells in 3D reconstructions throughout the entire developmental process (**Movie S5**). In combination with the excellent temporal resolution, this method has allowed us to visualize for the first time vulval morphogenesis in its entirety, uninterrupted across the L3/L4 molt.

### On-Chip RNAi Perturbation of AC Invasion

As a final case study, we assessed whether our microfluidic devices could be used to study perturbation of developmental processes *in vivo*. For this purpose, we inhibited basement membrane (BM) breaching during AC invasion (Sherwood *et al.* 2003) by RNAi-mediated inhibition of the *egl-43* gene, which encodes an essential transcription factor controlling AC invasion and proliferation (Hwang *et al.* 2007, Rimann *et al.* 2007, Deng *et al.* 2020, Sherwood *et al.* 2005). In wild-type animals, AC invasion invariably occurs during the late L3 stage, resulting in the dissolution of the BMs separating the uterus from the vulval epithelium and the establishment of a direct connection between the AC and 1° vulval cells (Sherwood *et al.* 2003). RNAi against *egl-43* by feeding worms dsRNA producing *E.coli* bacteria on plate causes an up to 96% penetrant BM breaching defect (Deng *et al.* 2020). Accordingly, we fed worms on-chip with *E.coli* carrying either an empty vector control plasmid or expressing *egl-43* dsRNA. In worms grown on empty vector containing bacteria, BM breaching typically occurred  $1.48 \pm 0.29$  hours after first signs of AC polarization, comparable to worms developing freely on plates (approximately 1.5 hours, Sherwood *et al.* 2005), and significantly faster than in worms continually imaged on agar pads (Berger *et al.* 2018). Importantly all but one of the animals grown on empty vector containing

bacteria, imaged on-chip displaying normal BM breaching by the end of the L3 stage ( $n=18$ ) (**Fig. 6A,A', Movie S6**). By contrast, in worms fed on chip with *egl-43* RNAi bacteria, none of the L3 animals imaged showed any signs of BM breaching, with the BM remaining intact well into the L4 stage ( $n=16$ ) (**Fig. 6B,B', Movie S7**). Furthermore, a mispositioning of the AC as well as AC proliferation was often observed (**Movie S7**), as reported previously (Deng *et al.* 2020). These experiments demonstrated that our microfluidic devices are well suited for *in vivo* perturbation experiments.

## Discussion

Herein, we present a novel microfluidic long-term imaging platform that allows for high-resolution imaging and tracking of a variety of developmental processes in *C. elegans* during all four larval stages up to adulthood. Moreover, our devices permit the imaging of multiple worms in parallel and across different larval stages, as animals on-chip can undergo molting and transition from one to the next larval stage. Contrary to previously published microfluidic-based long-term imaging strategies, this novel approach allows the preservation of both worm identity and worm orientation throughout the experimental timeframe, facilitating tracking of complex developmental processes in time. Trapping of up to 41 individual worms is accomplished using an array of identical trap channels, connected to an on-chip food supply and covered by a single large hydraulic valve. Immobilization of all trapped worms is achieved through the periodic inflation of the hydraulic valve, resulting in the trapped worms being pressed onto the cover glass only during image acquisition. High throughput imaging can be achieved through the narrowly spaced trap channel array, in combination with the large sensor of modern sCMOS cameras, simultaneously imaging between 3 and 14 animals, depending on the chosen magnification.

Device function, specifically whether it allows development under physiological conditions, was assessed in all four larval stages. Seam cell divisions during different larval stages were imaged using all device types and compared to the approximate developmental timing observed in freely crawling worms grown on NGM plates. We found very consistent development on-chip as evident from the low standard deviation of division times in each stage, as well as the generally good agreement between developmental timing on-chip and on NGM plates. Any observed differences most likely result from prolonged confinement through the low height of the device channels, as deviation from normal timing typically becomes pronounced during later stages

when animals outgrow a specific device. These findings are further supported by the reliable on-chip development observed in all other processes studied, such as P-cell migration, VPC induction, AC invasion and vulval morphogenesis. Using these devices, we were therefore able to gather data on developmental timing previously not available, for example by following both individual seam cells and P-cells throughout L1, vulval precursor cell induction and divisions or toroid formation during L4. In particular, we were for the first time able to observe the entirety of vulval morphogenesis in individual animals across the L3/L4 molt and obtain 3D reconstructions of the developing organ. This approach will be yielding new insights into the mechanism controlling vulval morphogenesis. Finally, we have demonstrated that our devices are not only suited to study wild-type *C. elegans* development, but can also be employed to perform gene perturbations by RNAi. On-chip perturbation may also be applied using other systems, such as using small molecule inhibitors or the auxin-inducible protein degradation system to inhibit proteins of interest (Zhang *et al.* 2015). These approaches will become invaluable when investigating the dynamic regulation of developmental processes.

Taken together, our results demonstrate the utility of a novel long-term imaging approach in studying a variety of developmental processes during *C. elegans* larval development with excellent image quality and without significant negative impact on developmental timing.

## Materials and Methods

### Worm Maintenance and Preparation for Microfluidic Imaging

Worms were maintained at 20°C on Nematode Growth Medium (NGM) plates seeded with *E. coli* OP50 as described (Brenner 1974). Prior to an experiment, worms were synchronized by bleaching of gravid adult hermaphrodites (Stiernagel 2006). The collected embryos were pelleted by centrifugation (1300rcf for 1 minute) and washed with fresh S-Basal buffer twice. Embryos were left to hatch in S-Basal overnight, arresting larvae in the L1 stage. After overnight incubation, arrested larvae were passed through a 10 µm filter (pluriStrainer Mini 10 µm, PluriSelect, USA), removing debris as well as unhatched embryos, washed twice with fresh buffer and grown on NGM plates. Once the synchronized population had reached the desired stage, worms were washed off the NGM plates using S-Basal buffer, washed twice with fresh S-Basal to remove any debris and loaded into the device. Larvae used in experiments with L1 animals were not

grown on NGM plates but directly loaded into the device right after washing. The following alleles and transgenes were used in this study:

LGI: *hmr-1(cp21[hmr-1::gfp + LoxP])* (Marston *et al.* 2016).

LGII: *arIs92[egl-17::cfp]* (Yoo *et al.* 2004).

LGII: *qyIs23[cdh-3>mCherry::PH; unc-119(+)]* (Ziel *et al.* 2009).

LGIV: *qyIs10[lam-1::gfp; unc-119 (+)]* (Ziel *et al.* 2009).

LGV: *qyIs50[Pcdh-3>mCherry::moeABD, unc-119(+)]* (Ziel *et al.* 2009).

LGX: *dlg-1(mc103[dlg-1::gfp])* (Vuong-Brender *et al.* 2017).

### Microfluidic Device Fabrication

Microfluidic devices were fabricated using standard soft- and photolithographic protocols (Xia *et al.* 1998). Briefly, master molds were fabricated on silicon wafers (Si-Wafer 4P0/>1/525±25/SSP/TTV<10, Siegert Wafer, Germany) using SU8 photoresist (GM1050 and GM1060, Gersteltec, Switzerland). Layers of different height were fabricated consecutively on the same wafer and aligned to each other using a mask aligner (UV-KUB3, Kloe, France). Masters of the fluidic layer for L1 devices were fabricated with heights of 3 and 8 µm, the L1-L4 device at heights of 5 and 12 µm and L2-A devices at heights of 5 and 15 µm (for the feeding and worm sections, respectively). The master mold for the control layer was fabricated on a separate wafer at a single height of 20 µm. All wafers were treated with chlorotrimethyl silane (Sigma Aldrich, Switzerland) vapor prior to PDMS casting, to prevent adhesion of the PDMS to the wafer and SU8 structures. PDMS devices were assembled by first spin coating (750 rpm for 30 seconds) the fluidic wafer with a thin layer of PDMS (Elastosil RT601; ratio 20:1, Wacker, Germany). Simultaneously an approximately 4 mm thick layer of PDMS (Elastosil RT601; ratio 5:1, Wacker, Germany) was cast on the control layer. Both PDMS layers were partially cured at 70°C. Once sufficiently cured the control layer was peeled from the wafer, cut to size and access holes punched (20G Catheter Punch, Syneo, USA). The control layer was then aligned to the fluidic layer using a stereomicroscope. Both layers were thermally bonded to one another overnight at 70°C (Unger *et al.* 2000). Bonded devices were peeled off the wafer, access holes punched (20G Catheter Punch, Syneo, USA) and bonded to cover glass (50x24 mm cover glass with se-

lected thickness  $0.17 \pm 0.01$  mm, Hecht Assistant, Germany) using an air plasma (Zepto Plasma cleaner, Diener, Germany).

### Device Operation

First, the on-chip hydraulic valve was filled with DI water by applying a constant pressure to the dead-end valve channel (**Fig. S2B,C**). For this, a short piece of 1/16" tygon tubing (15157044, Fisher Scientific, Switzerland) filled with DI water was connected to both the microfluidic device and an off-chip solenoid valve, which in turn was connected to an external pressure source. The dead-end hydraulic channel was filled due to the air permeable nature of PDMS. Under pressure, air initially present in the channel was pushed into the PDMS material, allowing the channel to completely fill with liquid. Second, the device was filled with the bacteria suspension introduced using 1/32" Tygon tubing (15137044, Fisher Scientific, Switzerland) connected to a 1 mL syringe (300-35-986, 30G blunt needle, Distrelec, Switzerland), and pressurized to remove all air bubbles from within the device (**Fig. S2D-F**). Finally, worms were introduced via the worm inlet. For worm-loading animals were loaded into a short piece of tubing (1/16" Tygon tubing, 15157044, Fisher Scientific, Switzerland) connected to a buffer-filled 1 mL syringe (300-35-970, 23G blunt needle, Distrelec, Switzerland) (**Fig. S2H**). The tubing was connected to the worm inlet and worms were pushed into the device by gently applying and releasing pressure on the syringe plunger. Worms were pushed from the common inlet into individual channels of the trap array and halted at the end of the trap channels at the transition from the trap channel to the lower height food supply channel. Bacteria food was supplied at a flow rate of  $1 \mu\text{L/hr}$ , with an increase in flow rate to  $100 \mu\text{L/hr}$  for 5 seconds every 30 minutes, to remove possibly accumulated debris (Aladdin AL-1000, WPI, USA). All worm loading was monitored at 10X magnification. Once channels were filled and suitable worms identified within the trap array, a high magnification, high NA objective was focused onto the device and image acquisition started. During image acquisition, the on-chip hydraulic valve was pressurized, effectively immobilizing worms within the trap channels. Pressure was released after image acquisition was completed leaving worms to move and feed freely.

## Image Acquisition

All images were acquired on an epifluorescence microscope (either a Ti-U, Nikon, Switzerland or DMRA2, Leica, Switzerland) equipped with an sCMOS camera (either a Prime 95B or Prime BSI, Photometrics, USA), a fluorescence light source (either LedHUB, Omicron Laserage Laserprodukte GmbH, Germany or Spectra, Lumencor, USA) and brightfield LED (either pE-100wht, Cooled, UK or MCWHLPI, Thorlabs, USA). Z-stacks were acquired using a piezo objective drive (either Nano-F100, Mad City Labs, USA or MIPOS 100 SG, Piezosystems Jena, Germany). Images were acquired in up to three colors at a Z-spacing of 0.2-0.5  $\mu\text{m}$  and a time interval of 15 minutes for up to 48 hours in all experiments. Smaller time intervals or longer overall image acquisition times may be chosen depending on the application and intensity of the marker used. In our experience when imaging for 48 hours, shorter imaging intervals should not affect development, but may require the use of brighter fluorescence markers and overall shorter experiment runtime so as not to affect development. Image acquisition generally may affect worm development if incompatible parameters are chosen.

Images were acquired either using a 40X water immersion lens (HC PL APO 40x/1.10 W CORR CS, Leica, Switzerland), a 40X oil immersion lens (HCX PL APO 40X/1.30 OIL, Leica, Switzerland), a 60X water immersion lens (CFI Plan Apo VC 60XC WI NA 1.2, Nikon, Switzerland) or 60X oil immersion lens (CFI Plan Apo Lambda 60X Oil NA1.4, Nikon, Switzerland). Image acquisition as well as actuation of the on-chip hydraulic valve was controlled through a custom written Matlab script (Matlab 2019b, Mathworks, USA) and a custom built microcontroller (Arduino Mega 2560, Arduino, Italy) for coordination of fluorescence and brightfield LEDs, piezo and camera. All images were acquired at  $20 \pm 0.5^\circ\text{C}$ , with temperature control achieved either via the room air-conditioning system, or a microscope cage incubator (H201-T-UNIT-BL-CRYO and H201-ENCLOSURE-CRYO, Okolab S.r.L., Italy).

## Image Deconvolution

Images were deconvolved either using the Huygens Deconvolution platform (SVI, Center for Microscopy and Image Analysis, University of Zürich) or the YacuDecu implementation of CUDA based Richardson Lucy deconvolution in Matlab.

### Bacterial Food Preparation

Worms were fed on-chip with *E. coli* NA22 grown overnight in LB medium at 37°C. 40 mL of saturated bacterial cultures were pelleted by centrifugation (3000 rcf for 2 minutes) and washed with fresh S-Basal buffer for a total of three washes. Finally, bacteria were pelleted and re-suspended in 1 mL fresh S-Basal, and 1 mL of bacterial suspension (50%) was mixed with 0.65 mL Optiprep (33%) (Sigma-Aldrich, Switzerland) for density matching of bacteria in suspension and 0.33 mL S-Basal supplemented with 1wt% Pluronic F127 (17%) (Sigma-Aldrich, Switzerland), a nonionic surfactant. Pluronic F127 was added to prevent bacteria aggregation in the low height section of the device and was found not to affect worm development at the chosen final concentration of 0.125%. Prior to filling the device, the bacteria suspension was passed through a 10 µm filter (pluriStrainer Mini 10 µm, PluriSelect, USA) to remove any large aggregates or debris. Bacteria food was prepared fresh for every experiment.

### Developmental Timing Assay

Developmental timing on-chip was determined by manually identifying the first seam cell division in each larval stage as well as the completion of eversion in images acquired using a 40X magnification at 15-minute intervals for up to 48 hours. Worms were synchronized as described above, and for imaging in the L1 stage loaded directly onto the microfluidic device after overnight starvation. Animals imaged from late L1 to L4 stage or late L2 stage to adulthood were first grown on NGM plates for 16 hours (L1-L4 device) and 24 hours (L2-A device) after seeding.

Developmental timing for free crawling worms was established on NGM plates seeded with *E. coli* NA22, the same bacterial strain used in on-chip experiments (to exclude any effect of food source on developmental timing). Worms were grown at 20°C for the entire duration and picked off the NGM plates every hour and the progression through seam cell division monitored. For each time-point on average 10-15 animals were imaged, resulting in the average developmental progression. For worms on plate developmental time was estimated as the median between the first time point at which animals of both stages are present on plate and the first time point at which all animals transitioned to the next stage.



### **Hypodermis Development Assay**

Synchronized L1 populations were generated by bleaching gravid adult hermaphrodite animals and allowing the larvae to hatch overnight in S-Basal buffer. After overnight incubation, worms were filtered through a 10  $\mu$ m filter and washed twice with fresh S-Basal. Worms were then loaded onto the L1 device and imaged at 15-minute intervals for a total of 48 hours using a 40X magnification objective. Seam and P-cells were tracked manually using Fiji software (Schindelin *et al.* 2012) and the start of each cell division identified using the DLG-1::GFP marker.

Development on plates was assessed as above. Worms were grown at 20°C, on NGM plates seeded with *E. coli* NA22. Every hour approximately 10 worms were picked off the plate and imaged. The time required to reach specific developmental time points was estimated as the median between the point at which the first animals reached the specific developmental stage and the first time point by which all assessed worms had reached the specific stage.

### **VPC induction Assay**

Synchronized L1 larvae were initially grown on NGM plates and harvested approximately 16 hours after seeding (late L1 stage). Worms were washed and loaded as described, imaged using a 40X magnification, acquiring a full Z-stack every 30 minutes for a total of 48 hours. CFP-fluorescence intensity of the 1° fated VPCs and gonad length were measure manually over time using Fiji software (Schindelin *et al.* 2012). Measured maximum fluorescence intensity was normalized (using the maximum observed intensity in 2-cell or 4-cell stage) and background subtracted for comparison.

### **Vulval Morphogenesis Assay**

Worms were grown as described above with synchronized L1 larvae grown on NGM plates and harvested 24 hours after seeding. Worms were imaged at 60X magnification with the FOV set up, such that worms would remain in the available field-of-view throughout the experiment. For analysis, the developing vulva was cropped using a custom written Matlab script, followed by deconvolution of the acquired images. Measurements were taken manually at select time points using Fiji software (Schindelin *et al.* 2012).

## On-Chip RNAi

Prior to each experiment 20 mL of LB medium supplemented with ampicillin (0.1 mg/mL final concentration) were inoculated with bacteria from the stock LB plates and grown at 37°C overnight. Following this initial growth period additional 20 mL of LB medium supplemented with IPTG (1mM final concentration) and ampicillin (0.1 mg/mL) was added to the overnight culture and bacteria were grown for another 3 hours to induce dsRNA synthesis (Conte *et al.* 2015). After this second growth phase, bacteria were harvested and processed as described in the above section, resulting in the desired worm RNAi bacteria food. It should be noted that for RNAi a different bacterial strain is used (HT115). Therefore, the necessary concentration of Optiprep was adjusted from 0.65 mL (33%) (stated above) to 0.59 mL (30%), likewise the amount of S-Basal supplemented with Pluronic F127 was adjusted in compensation to 0.38 mL and an additional 0.002mL of IPTG (1M stock concentration) was added.

Worms were initially grown on RNAi plates, produced by adding IPTG (1mM final concentration) and ampicillin (0.1 mg/mL final concentration) to the standard NGM plate mixture and seeded with the respective RNAi bacterial strain. Bacteria for seeding were grown following the same scheme outlined above, starting from an overnight culture with ampicillin only, followed by a second 3-hour growth phase in the presence of IPTG. The bacterial culture was then concentrated to approximately 1/5<sup>th</sup> of the initial volume and each NGM plate seeded with 0.3 mL of concentrate. RNAi bacteria were allowed to grow on plate, at room temperature for at least 24 hours before seeding worms. Worms were prepared by bleaching of gravid adult animals as described above and grown on RNAi plates from µ L1 stage onwards, harvested approximately 24 hours after seeding and loaded into the microfluidic device as described. Images for both RNAi conditions were acquired at 15-minute intervals at 60X magnification for a total of 36 hours.

The time required for BM breaching was score as the time from the appearance of first signs of polarization in the AC (indicated by the *Pcdh-3>mCherry::moeABD* reporter) to the appearance of a hole in the BM (indicated by the *LAM-1::GFP (qyIs10[lam-1::gfp; unc-119 (+)] IV)*).

**Acknowledgements.** We wish to thank the members of the Hajnal laboratory for critical discussion and comments on the manuscript. We are also grateful to the *C. elegans* Genetics Center CGC, which is funded by NIH Office of Research Infrastructure Programs (P40 OD010440) and J. Ahringer for RNAi clones. This work was supported by grants from the Swiss National Sci-

ence Foundation no. 31003A-166580 to AH, the Swiss Cancer league no. 4377-02-2018 to AH and funding by ETH Zürich to AdM.

**Competing interests.** The authors declare no competing or financial interests

**Author contributions.** SB conceived the method and designed experiments. SB performed all microfluidic experiments. SS performed NGM control experiments. SB and SS analyzed data. SB, AdM and AH wrote the manuscript.

## References

- Austin, J. and Kenyon, C.** (1994). Cell contact regulates neuroblast formation in the *Caenorhabditis elegans* lateral epidermis. *Development*, **120**, 313-323.
- Berger, S., Lattmann, E., Aegerter-Wilmsen, T., Hengartner, M., Hajnal, A., deMello, A. and i Solvas, X.C.** (2018). Long-term *C. elegans* immobilization enables high resolution developmental studies *in vivo*. *Lab Chip*, **18**, 1359-1368.
- Berset, T., Hoier, E.F., Battu, G., Canevascini, S. and Hajnal, A.** (2001). Notch inhibition of RAS signaling through MAP kinase phosphatase LIP-1 during *C. elegans* vulval development. *Science*. **291**, 1055-1058.
- Brenner, S.** (1974). The genetics of *Caenorhabditis elegans*. *Genetics*. **77**(1), 71-94.
- Chen, N. and Greenwald, I.** (2004). The lateral signal for LIN-12/Notch in *C. elegans* vulval development comprises redundant secreted and transmembrane DSL proteins. *Dev. Cell*. **6**, 183-192.
- Chronis, N., Zimmer, M. and Bargmann, C.I.** (2007). Microfluidics for *in vivo* imaging of neuronal and behavioral activity in *Caenorhabditis elegans*. *Nat. Methods*. **4**, 727-731.
- Chung, K., Crane, M.M. and Lu, H.** (2008). Automated on-chip rapid microscopy, phenotyping and sorting of *C. elegans*. *Nat. Methods*. **5**, 637-643.

- Conte Jr, D., MacNeil, L.T., Walhout, A.J. and Mello, C.C.** (2015). RNA interference in *Caenorhabditis elegans*. *Curr. Protoc. Mol. Biol.* **109**, 26-3.
- Deng, T., Stempor, P., Appert, A., Daube, M., Ahringer, J., Hajnal, A. and Lattmann, E.** (2020). The *Caenorhabditis elegans* homolog of the Evi1 proto-oncogene, egl-43, coordinates G1 cell cycle arrest with pro-invasive gene expression during anchor cell invasion. *PLoS Genet.* **16**, e1008470.
- Euling, S. and Ambros, V.** (1996). Heterochronic genes control cell cycle progress and developmental competence of *C. elegans* vulva precursor cells. *Cell* **84**, 667-676.
- Fang-Yen, C., Gabel, C.V., Samuel, A.D., Bargmann, C.I. and Avery, L.** (2012). Laser microsurgery in *Caenorhabditis elegans*. *Methods in Cell Biol.* **107**, 177-206.
- Fisher, J., Piterman, N., Hajnal, A. and Henzinger, T.A.** (2007). Predictive modeling of signaling crosstalk during *C. elegans* vulval development. *PLoS Comput Biol.* **3**, e92.
- Gokce, S.K., Hegarty, E.M., Mondal, S., Zhao, P., Ghorashian, N., Hilliard, M.A. and Ben-Yakar, A.** (2017). A multi-trap microfluidic chip enabling longitudinal studies of nerve regeneration in *Caenorhabditis elegans*. *Sci, Rep.* **7**, 1-12.
- Goodman, M.B., Hall, D.H., Avery, L. and Lockery, S.R.** (1998). Active currents regulate sensitivity and dynamic range in *C. elegans* neurons. *Neuron.* **20**, 763-772.
- Greenwald, I.S., Sternberg, P.W. and Horvitz, H.R.** (1983). The lin-12 locus specifies cell fates in *Caenorhabditis elegans*. *Cell.* **34**(2):435-444.
- Gritti, N., Kienle, S., Filina, O. and Van Zon, J.S.** (2016). Long-term time-lapse microscopy of *C. elegans* post-embryonic development. *Nat. Comm.* **7**, 12500.
- Hagedorn, E.J., Yashiro, H., Ziel, J.W., Ihara, S., Wang, Z. and Sherwood, D.R.** (2009). Integrin acts upstream of netrin signaling to regulate formation of the anchor cell's invasive membrane in *C. elegans*. *Dev. Cell*, **17**, 187-198.

- Hedgecock, E.M. and White, J.G.** (1985). Polyploid tissues in the nematode *Caenorhabditis elegans*. *Dev. Biol.* **107**, 128-133.
- Hedgecock, E.M., Culotti, J.G., Hall, D.H. and Stern, B.D.** (1987). Genetics of cell and axon migrations in *Caenorhabditis elegans*. *Development*. **100**, 365-382.
- Hulme, S.E., Shevkoplyas, S.S., Apfeld, J., Fontana, W. and Whitesides, G.M.** (2007). A microfabricated array of clamps for immobilizing and imaging *C. elegans*. *Lab Chip* **7**, 1515-1523.
- Hulme, S.E., Shevkoplyas, S.S., McGuigan, A.P., Apfeld, J., Fontana, W. and Whitesides, G.M.** (2010). Lifespan-on-a-chip: microfluidic chambers for performing lifelong observation of *C. elegans*. *Lab Chip*. **10**, 589-597.
- Hwang, B.J., Meruelo, A.D. and Sternberg, P.W.** (2007). *C. elegans* EVI1 proto-oncogene, EGL-43, is necessary for Notch-mediated cell fate specification and regulates cell invasion. *Development*. **134**, 669-679.
- Katz, W.S., Hill, R.J., Clandinin, T.R. and Sternberg, P.W.** (1995). Different levels of the *C. elegans* growth factor LIN-3 promote distinct vulval precursor fates. *Cell*. **82**, 297-307.
- Keil, W., Kutscher, L.M., Shaham, S. and Siggia, E.D.** (2017). Long-Term High-Resolution Imaging of Developing *C. elegans* Larvae with Microfluidics. *Dev. Cell*. **40**, 202-214.
- Krajniak, J. and Lu, H.** (2010). Long-term high-resolution imaging and culture of *C. elegans* in chip-gel hybrid microfluidic device for developmental studies. *Lab Chip* **10**, 1862-1868.
- Lee, H., Kim, S.A., Coakley, S., Mugno, P., Hammarlund, M., Hilliard, M.A. and Lu, H.** (2014). A multi-channel device for high-density target-selective stimulation and longterm monitoring of cells and subcellular features in *C. elegans*. *Lab Chip*. **14**, 4513-4522.
- Luke, C.J., Niehaus, J.Z., O'Reilly, L.P. and Watkins, S.C.** (2014). Non-microfluidic methods for imaging live *C. elegans*. *Methods*. **68**, 542-547.

- Marston, D.J., Higgins, C.D., Peters, K.A., Cupp, T.D., Dickinson, D.J., Pani, A.M., Moore, R.P., Cox, A.H., Kiehart, D.P. and Goldstein, B.** (2016). MRCK-1 drives apical constriction in *C. elegans* by linking developmental patterning to force generation. *Curr. Biol.* **26**, 2079-2089.
- Mereu, L., Morf, M.K., Spiri, S., Gutierrez, P., Escobar-Restrepo, J.M., Daube, M., Walser, M. and Hajnal, A.** (2020). Polarized epidermal growth factor secretion ensures robust vulval cell fate specification in *Caenorhabditis elegans*. *Development*. **147**, dev175760.
- Mok, D.Z., Sternberg, P.W. and Inoue, T.** (2015). Morphologically defined sub-stages of *C. elegans* vulval development in the fourth larval stage. *BMC Dev. Biol.* **15**, 1-8.
- Mondal, S., Hegarty, E., Martin, C., Gökçe, S.K., Ghorashian, N. and Ben-Yakar, A.** (2016). Large-scale microfluidics providing high-resolution and high-throughput screening of *Caenorhabditis elegans* poly-glutamine aggregation model. *Nat. Comm.* **7**, 13023.
- Newman, A.P., White, J.G. and Sternberg, P.W.** (1996). Morphogenesis of the *C. elegans* hermaphrodite uterus. *Development* **122**, 3617-3626.
- Nusser Stein, S., Beyer, A., Rimann, I., Adamczyk, M., Piterman, N., Hajnal, A. and Fisher, J.** (2012). Cell cycle regulation of NOTCH signaling during *C. elegans* vulval development. *Mol. Syst. Biol.* **8**, 618.
- Podbilewicz, B. and White, J.G.** (1994). Cell fusions in the developing epithelia of *C. elegans*. *Dev. Biol.* **161**, 408-424.
- Rimann, I. and Hajnal, A.** (2007). Regulation of anchor cell invasion and uterine cell fates by the *egl-43* *Evi-1* proto-oncogene in *Caenorhabditis elegans*. *Dev. Biol.* **308**, 187-195.
- Rohde, C.B., Zeng, F., Gonzalez-Rubio, R., Angel, M. and Yanik, M.F.** (2007). Microfluidic system for on-chip high-throughput whole-animal sorting and screening at subcellular resolution. *PNAS*. **104**, 13891-13895.

- Samara, C.; Rohde, C. B.; Gilleland, C. L.; Norton, S.; Haggarty, S. J.; Yanik, M. F.** (2010). Large-scale *in vivo* femtosecond laser neurosurgery screen reveals small-molecule enhancer of regeneration. *PNAS*. **107**, 18342-18347.
- San-Miguel A. and Lu H.** (2013). Microfluidics as a tool for *C. elegans* research. WormBook, ed. The *C. elegans* Research Community, WormBook, doi/10.1895/wormbook.1.162.1, <http://www.wormbook.org>.
- Schindelin, J., Arganda-Carreras, I., Frise, E., Kaynig, V., Longair, M., Pietzsch, T., Preibisch, S., Rueden, C., Saalfeld, S., Schmid, B. and Tinevez, J.Y.** (2012). Fiji: an open-source platform for biological-image analysis. *Nat. Methods*. **9**, 676-682.
- Schindler, A.J. and Sherwood, D.R.** (2013). Morphogenesis of the *Caenorhabditis elegans* vulva. *Wiley Interdiscip. Rev. Dev. Biol.* **2**, 75-95.
- Schmid, T. and Hajnal, A.** (2015). Signal transduction during *C. elegans* vulval development: a NeverEnding story. *Curr. Opin. Genet. Dev.* **32**, 1-9.
- Sharma-Kishore, R., White, J.G., Southgate, E. and Podbilewicz, B.** (1999). Formation of the vulva in *Caenorhabditis elegans*: a paradigm for organogenesis. *Development* **126**, 691-699.
- Sherwood, D.R. and Sternberg, P.W.** (2003). Anchor cell invasion into the vulval epithelium in *C. elegans*. *Dev. Cell*. **5**, 21-31.
- Sherwood, D.R., Butler, J.A., Kramer, J.M. and Sternberg, P.W.** (2005). FOS-1 promotes basement-membrane removal during anchor-cell invasion in *C. elegans*. *Cell*. **121**, 951-962.
- Sternberg, P.W. and Horvitz, H.R.** (1986). Pattern formation during vulval development in *C. elegans*. *Cell*. **44**, 761-772.
- Sternberg, P.W. and Horvitz, H.R.** (1989). The combined action of two intercellular signaling pathways specifies three cell fates during vulval induction in *C. elegans*. *Cell*. **58**, 679-693.
- Sternberg, P.W.** (2005) Vulval development, *WormBook*, ed. The *C. elegans* Research Community, WormBook, doi/10.1895/wormbook.1.6.1, <http://www.wormbook.org>.



- Stirman, J.N., Brauner, M., Gottschalk, A. and Lu, H.** (2010). High-throughput study of synaptic transmission at the neuromuscular junction enabled by optogenetics and microfluidics. *J. Neurosci. Methods* **191**, 90-93.
- Stiernagle, T.** (2006). Maintenance of *C. elegans*. WormBook, ed. The *C. elegans* Research Community, WormBook, doi/10.1895/wormbook.1.101.1, <http://www.wormbook.org>.
- Sulston, J.E. and Horvitz, H.R.** (1977). Post-embryonic cell lineages of the nematode, *Caenorhabditis elegans*. *Dev. Biol.* **56**, 110-156.
- Sulston, J.E., Schierenberg, E., White, J.G. and Thomson, J.N.** (1983). The embryonic cell lineage of the nematode *Caenorhabditis elegans*. *Dev. Biol.* **100**, 64-119.
- Sundaram, M.V.** (2005). The love-hate relationship between Ras and Notch. *Genes Dev.* **19**, 1825-1839.
- Unger, M.A., Chou, H.P., Thorsen, T., Scherer, A. and Quake, S.R.** (2000). Monolithic microfabricated valves and pumps by multilayer soft lithography. *Science*. **288**, 113-116.
- Vuong-Brender, T.T.K., Suman, S.K. and Labouesse, M.** (2017). The apical ECM preserves embryonic integrity and distributes mechanical stress during morphogenesis. *Development*. **144**, 4336-4349.
- Wang, B.B., Müller-Immergluck, M.M., Austin, J., Robinson, N.T., Chisholm, A. and Kenyon, C.** (1993). A homeotic gene cluster patterns the anteroposterior body axis of *C. elegans*. *Cell* **74**, 29-42.
- Wolke, U., Jezuit, E.A. and Priess, J.R.** (2007). Actin-dependent cytoplasmic streaming in *C. elegans* oogenesis. *Development*. **134**, 2227-2236.
- Xia, Y. and Whitesides, G.M.** (1998). Soft lithography. Annual Review of Materials. *Science*. **28**, 153-184.

- Yoo, A.S., Bais, C. and Greenwald, I.** (2004). Crosstalk between the EGFR and LIN-12/Notch pathways in *C. elegans* vulval development. *Science*. **303**, 663-666.
- Zhang, L., Ward, J.D., Cheng, Z. and Dernburg, A.F.** (2015). The auxin-inducible degradation (AID) system enables versatile conditional protein depletion in *C. elegans*. *Development*. **142**, 4374-4384.
- Ziel, J.W., Hagedorn, E.J., Audhya, A. and Sherwood, D.R.** (2009). UNC-6 (netrin) orients the invasive membrane of the anchor cell in *C. elegans*. *Nat. Cell Biol.*, **11**, 183-189.

## Figures

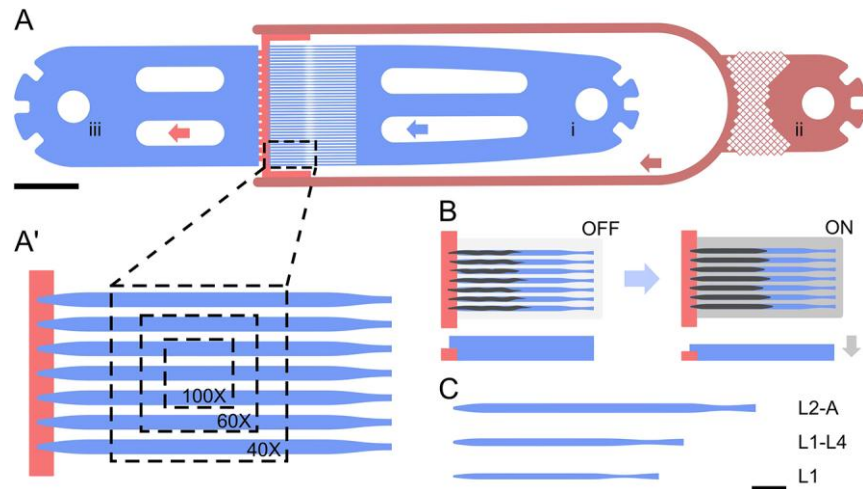

**Fig. 1 – Microfluidic devices.** (A) Device overview. Worms are loaded manually from (i) and pushed into a parallel channel array, housing up to 41 individual animals. A bacteria suspension is constantly supplied to all trap channels from (ii), with liquid leaving the device via the outlet (iii). Arrows indicate flow direction. (A') Magnified view of the parallel imaging scheme. All trap channels (blue) connect to the same lower height food supply channel (red). Individual worms are held in the parallel channel array with device dimensions chosen to be significantly bigger than the worms initially loaded, allowing for growth over time. Bacterial food is constantly supplied via the low height channel (red) adjacent to the trap channel array. The low channel height allows for bacteria to flow through unimpeded and keeps worms from entering the food channel, effectively confining them to the imaging region of the device. Overlay shows the ROI achievable with different magnifications. (B) Functional principle. For most of the experiments, worms are held loosely in their respective trap channels with the active immobilization valve OFF. During image acquisition, the valve is turned ON with a pressure of 10-15 psi, resulting in the worms pressed onto the cover glass and immobilized. Once images are acquired, the valve is released. A side view of the trap channel is shown underneath. Channel height decreases in the ON state resulting in compressive force on the trapped animals (gray arrow indicates force direction). (C) Schematic of individual channels. Overview of the three device types and their relative scales. Scale bars are (A) 1000  $\mu\text{m}$  and (B,C) 50  $\mu\text{m}$ .

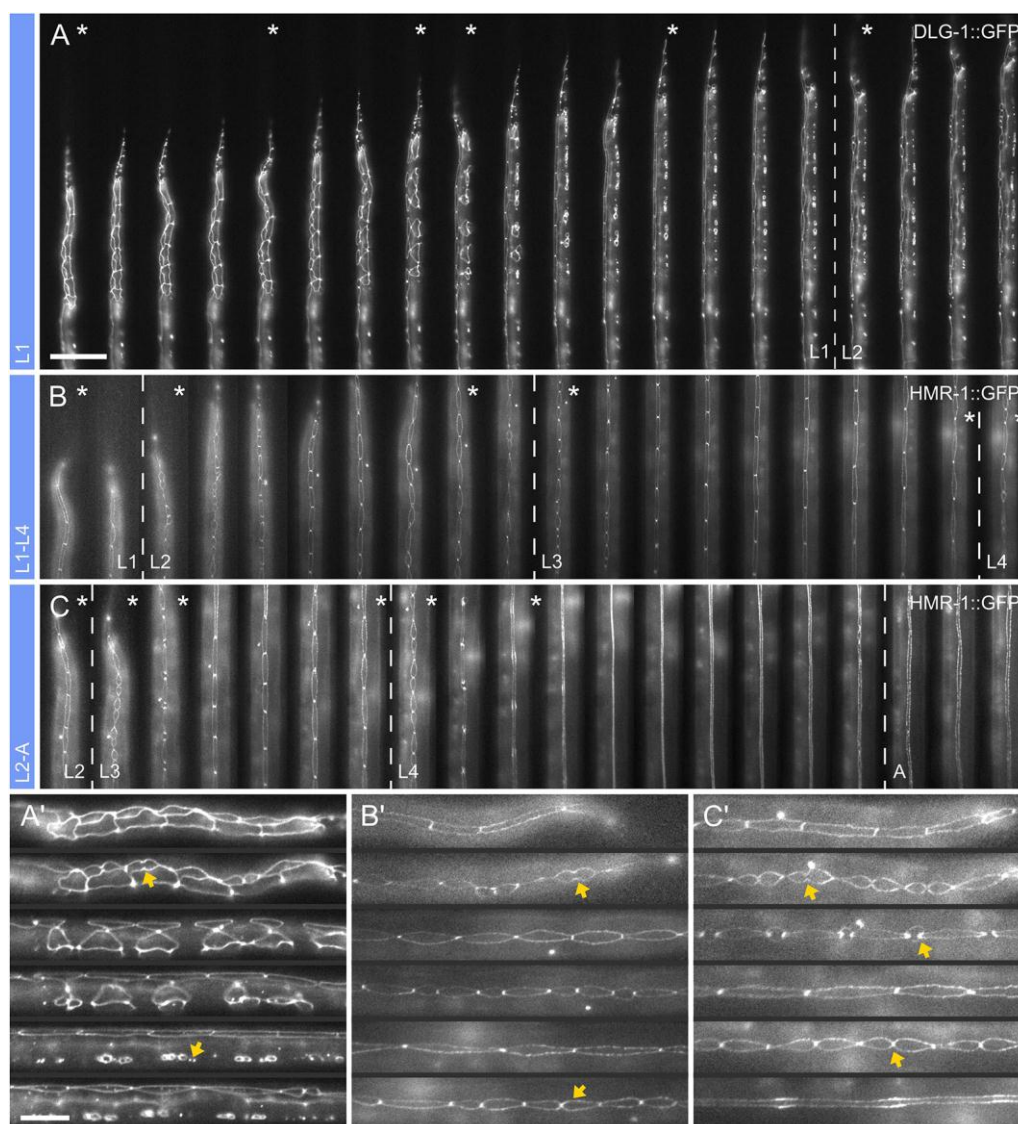

**Fig. 2 – Developmental Timing.** Reliability of development on-chip was assessed by imaging development of the hypodermis across all larval stages. **(A)** Single L1 stage larva imaged from starvation-induced arrest after hatching until the L2 stage using the L1 device. Both seam cell and P-cell divisions are shown. The dashed line indicates the transition between L1 and L2, determined by the first seam cell division in L2. **(B-C)** Cropped views of a **(B)** single larva imaged from late L1 across L2 and L3 until the L4 stage using the L1-L4 device, and from the **(C)** a late L2 stage, imaged across the L3 and L4 stages until adulthood using the L1-L4 device. As in L1 larvae, development was scored using the hypodermis, with the occurrence of the first seam cell division indicating the end of the previous and beginning of the next larval stage or in L4, the occurrence of vulval eversion indicating the beginning of adulthood. Dashed lines indicate tran-

sitions between stages. (**A'-C'**) Magnified view of selected time points for images shown in (**A-C**, \*) respectively. Highlighted are some of the various seam cell division and fusion events observed along the worm development. Time progression from left to right and time frames are shown at 1-hour intervals. Raw images acquired at 40X magnification are shown. Scale bar in (**A**) 50  $\mu\text{m}$  and in (**A'**) 20  $\mu\text{m}$ , same scale for (**B,C**) and (**B',C'**) respectively.

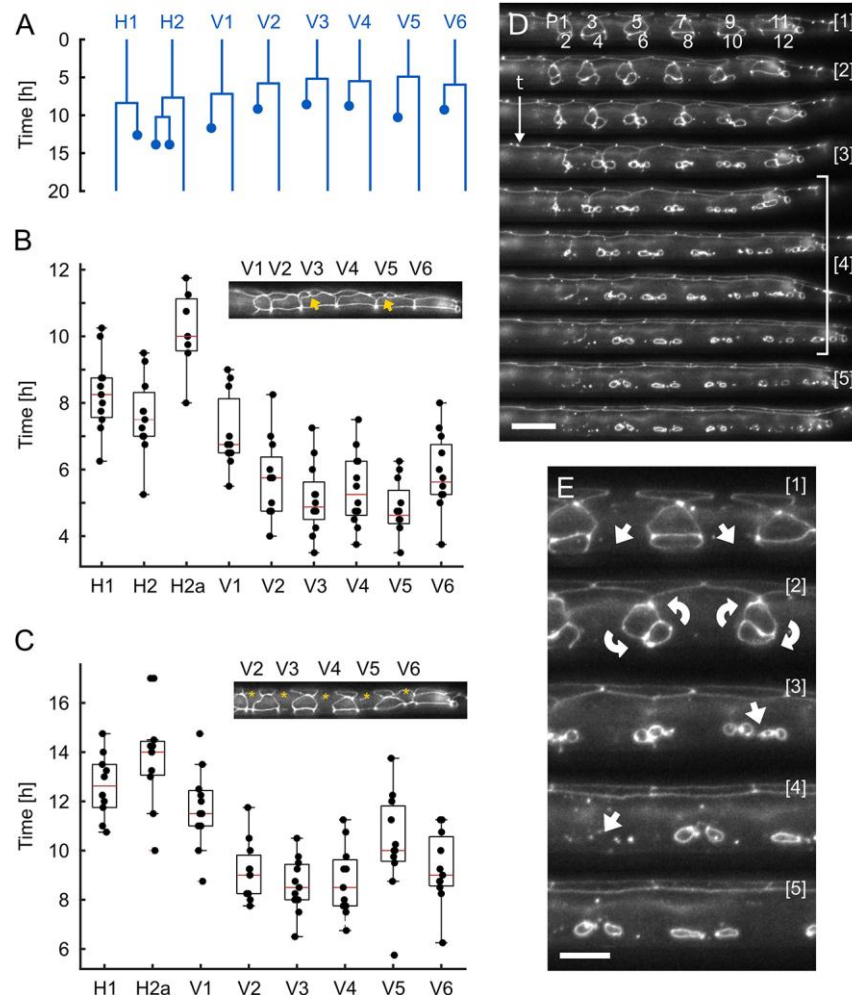

**Fig. 3 – Development of the Hypodermis.** (A) Average seam cell lineage constructed from all L1 larvae analyzed. The seam cells except for H0, which does not divide in any larval stage, and the posterior T cell and its descendants are shown. The average time by which each cell divides is indicated, with V5 dividing first and H1 dividing last. The times at which one or several of the daughter cells fuse with the surrounding hyp7 are represented by the dots. (B) Quantification of the seam cell divisions across the L1 stage ( $n=12$ ). Insert: representative image showing V3 and V5 post division (arrowhead) with all other seam cells still undivided. (C) Quantification of the time at which the anterior daughter seam cells fuse with hyp7 ( $n=12$ ). Insert: representative image showing seam cells fused to hyp7 (\*). Box plots in (B) and (C) show the median (red lines) with upper and lower quartiles, bars indicate the most extreme points of the distribution. Data in (B) and (C) were used to derive the average seam cell lineage shown in (A). Insets show repre-

sentative images in which V4a has completely fused with hyp7, V3 and V5 are close to complete fusion and all other seam cells are still unfused. **(D)** Representative images showing P-cells migrating from their initial location toward the ventral midline, as well as the divisions along the A-P axis and cell fusion manifesting by the dissolution of the HMR-1::GFP labelled cell junctions. [1] shows the six pairs of P-cells (from left to right P1/2 through 11/12) initially attached to V2a-V6a. [2] P-cells begin migrating and rotating toward the ventral midline. [3] P-cells in mid migration, with some already aligned with the ventral midline. [4] P-cells divide and some descendants fuse with the surrounding hypodermis. [5] Six P-cells (P3.p-P8.p) that become the VPCs remain unfused and will divide in L3 to form the vulva. Time progression from top to bottom, images are shown at 45-minute intervals. **(E)** Magnified views of time points [1-5] shown in **(D)**. Raw images acquired at 40X magnification are shown. All images show ventral side down. Scale bar **(D)** 15  $\mu\text{m}$  and **(E)** 7.5  $\mu\text{m}$ .



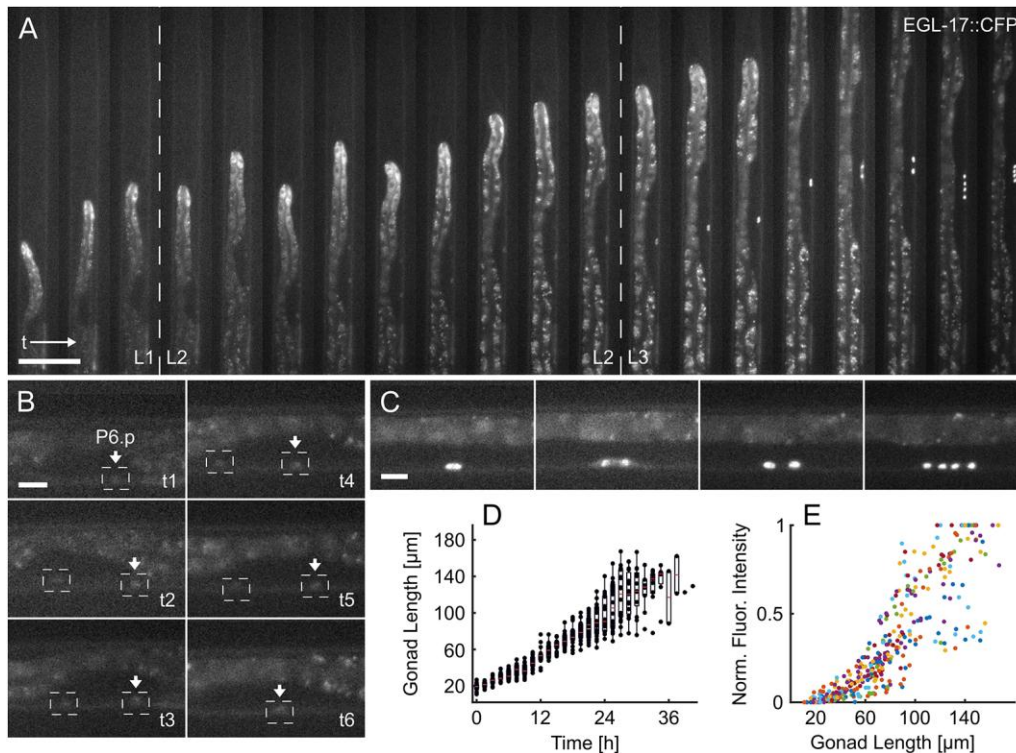

**Fig. 4 – Vulval fate specification.** (A) Overview of vulva induction from late L1 to the 4-cell stage in mid L3. Stable expression of the 1° VPC fate reporter EGL-17::CFP in P6.p is established over the course of the L2 stage, followed by three rounds of cell division. The first two rounds of VPC division were recorded. Time progresses from left to right at 1.5-hour intervals. (B) Magnified views of the worm in (A). EGL-17::CFP expression first becomes apparent in P6.p during the early L2 stage (t1), but initially expression is also detectable in P5.p (t2-t5), until the 1° fate is firmly established in P6.p during L2 (t6). (C) Magnified views of the worm in (A) during L3 highlighting the 1° fated VPC (P6.p) before its first division, during the first division, as well as after the first and second divisions. (D) Gonad length measured over time ( $n=19$ ). Especially during the L2 and early L3 stages gonad length increases linearly with time, showing little variation between animals. Measurement variation increases toward the end of L3 stage as the gonad becomes partially obstructed by the intestine. The linear increase in gonad length especially early on during the experiment indicates reliable development on-chip. Time on x-axis refers to experimental time with time point 0 marking the start of an experiment. (E) Normalized maximum EGL-17::CFP fluorescence intensity relative to gonad length as timing reference

( $n=19$ ). The observed fluorescence intensities vary substantially between individual worms, which are indicated by color-coded dots. The box plots in **(D)** show the median values (red lines) with upper and lower quartiles and bars indicating the extremes of the distribution. Raw images acquired at 40X magnification. Scale bars are **(A)** 50  $\mu\text{m}$  and **(B,C)** 10  $\mu\text{m}$ .

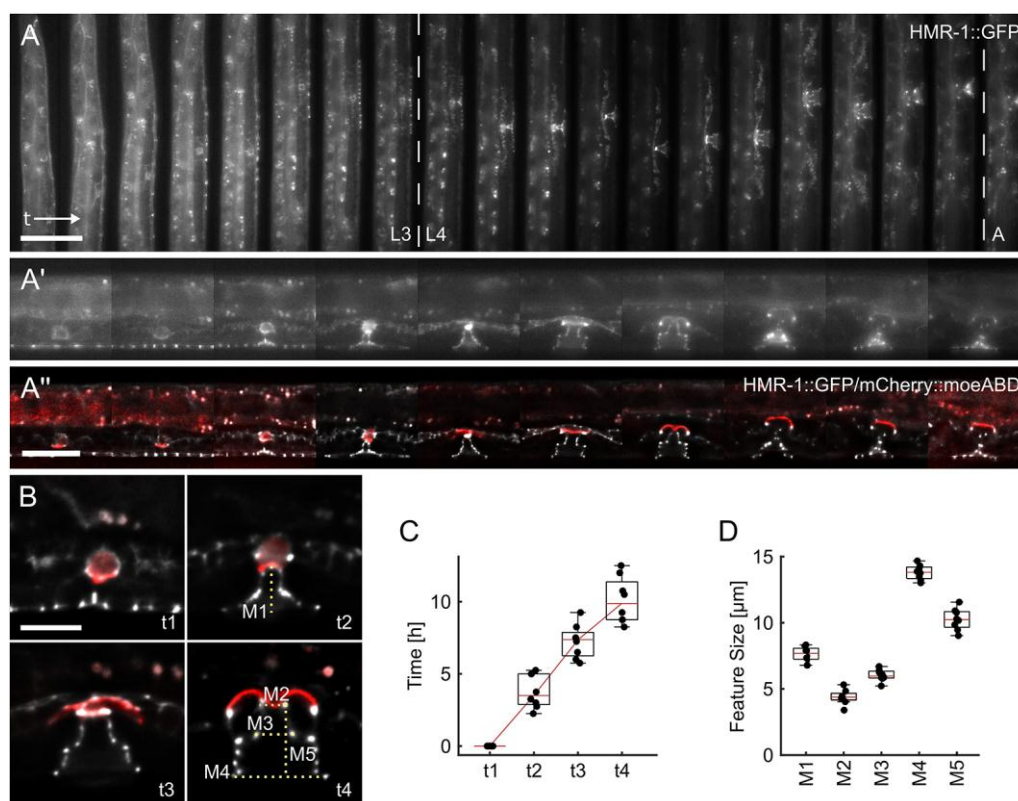

**Fig. 5 – Vulval morphogenesis.** (A) Overview of complete vulval development. The HMR-1::GFP marker was used to observe the cell junctions of the VPCs and the toroids forming the vulva. A single animal, with time progressing from left to right at 1-hour intervals shows the three rounds of VPC divisions during L3, followed by vulval invagination and toroid formation in L4 and finally eversion of the vulva during L4/adult transition. (A') Magnified views of selected time points from (A), illustrating the excellent raw image quality attainable. (A'') Magnified and deconvolved z-sections of the same frames shown in (A') illustrating the attainable image quality. The HMR-1::GFP signal is overlaid with the mCherry::moeABD marker in red outlining the AC (**Movie S5**). (B) Vulval development at the L4.0 (t1), L4.1 (t2), L4.3 (t3) and L4.5 (t4) stages defined by (Mok *et al.* 2015). The average time needed for animals to transition from one time point to the next, as well as morphological features indicated by the dotted lines and M1-5 were measured. (C) Time needed for animals to develop from L4.0 to L4.5, indicating a linear transition through different developmental checkpoints and little variation between animals. Linear progression here is indicative of regular and reproducible development. (D) Sizes of

the features M1- M5 measured for all animals, indicating close clustering of measured values. The box plots in (C) and (D) show the median (red lines) with upper and lower quartiles and bars indicating the extremes of the distribution. Raw images acquired at 60X magnification, except for (A'') and (B), which show deconvolved z-sections. Scale bars are (A) 50  $\mu\text{m}$ , (A') 25  $\mu\text{m}$  and (B) 10  $\mu\text{m}$ , same scale for (A') and (A'').

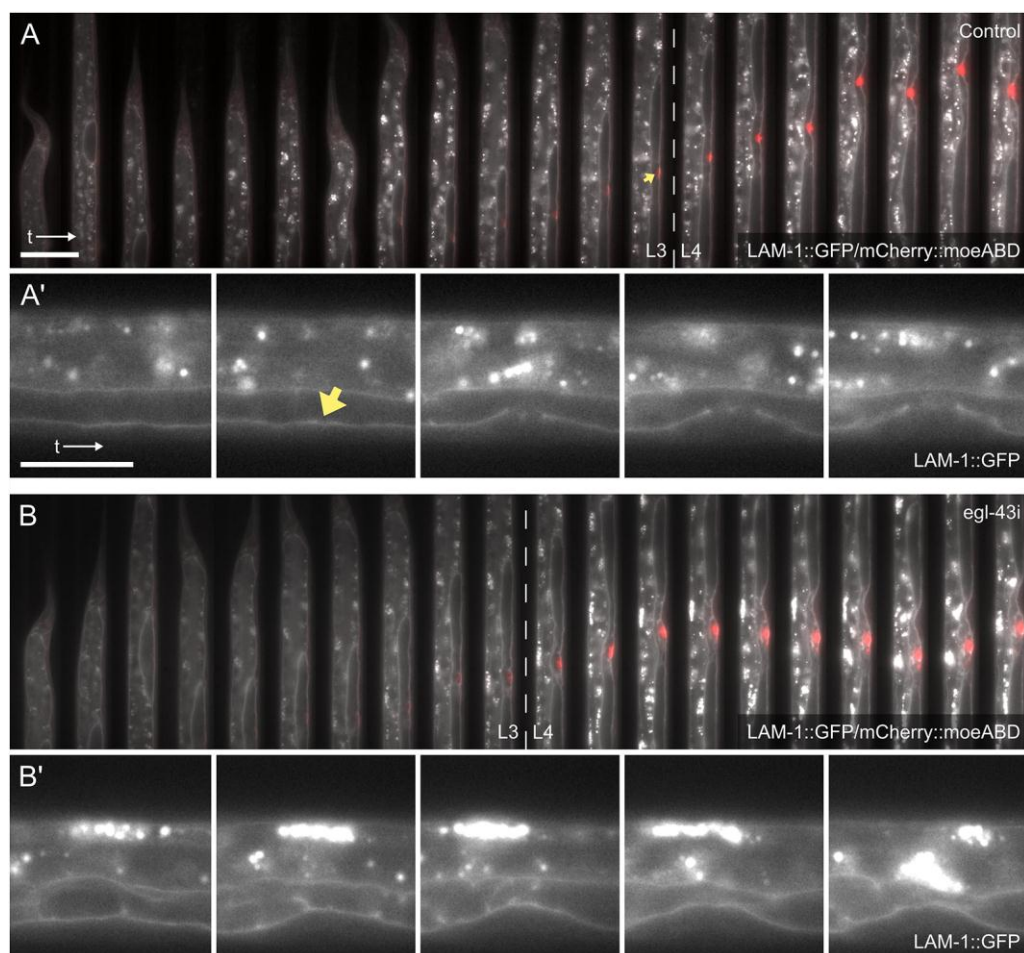

**Fig. 6 – On-chip perturbation of AC invasion.** (A) Overview of AC invasion in an empty vector treated control. A single worm imaged from L2 until late L4 is shown, progressing from left to right at 1-hour intervals. The LAM-1::GFP (*qyIs10[lam-1::gfp; unc-119 (+)] IV*) marker labelling the BMs (gray) and the *Pcdh-3>mCherry::moeABD* reporter(*qyIs50*) outlining the AC (red) were used. (A') Magnified views of time points selected from (A). During late L3, the BMs are breached (yellow arrowheads), shortly before vulval invagination begins. (B) AC invasion in an *egl-43* RNAi-treated animal. Contrary to the control shown in (A), the BMs are not breached and remain intact after invagination well into the L4 stage. The AC is misaligned with the 1° VPCs and multiple ACs are formed during L4. (B') Magnified views of time points selected from (B). Raw images acquired at 60X magnification. Scale bars (A) 50  $\mu$ m and (A') 25  $\mu$ m, (B) and (B') are shown at the same respective scales.

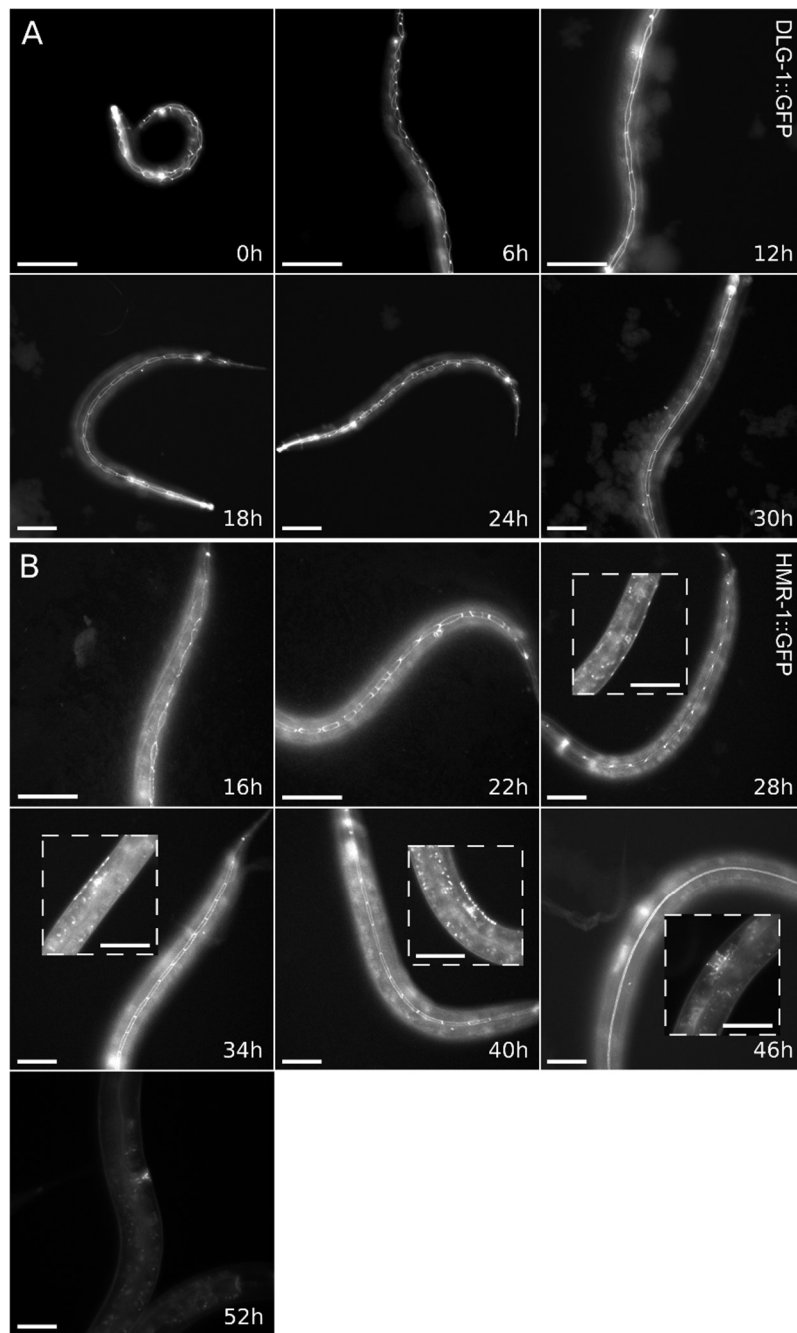

**Fig. S1. Control of developmental timing on NGM plates.** Representative images of worms with either the (A) DLG-1::GFP or (B) HMR-1::GFP. (A) Seam cells visualized in DLG-1::GFP expressing animals were imaged from overnight starved L1s ( $t = 0h$ ) up to the end of L2 stage ( $t = 30h$ ). (B) Seam cells in HMR-1::GFP expressing animals from 16 hours post seeding of overnight starved L1 animals up to the L4/adult transition indicated by vulval eversion. Dashed insert shows a view of the VPCs/vulva at the specific developmental stage. All scale bars 50  $\mu m$ .



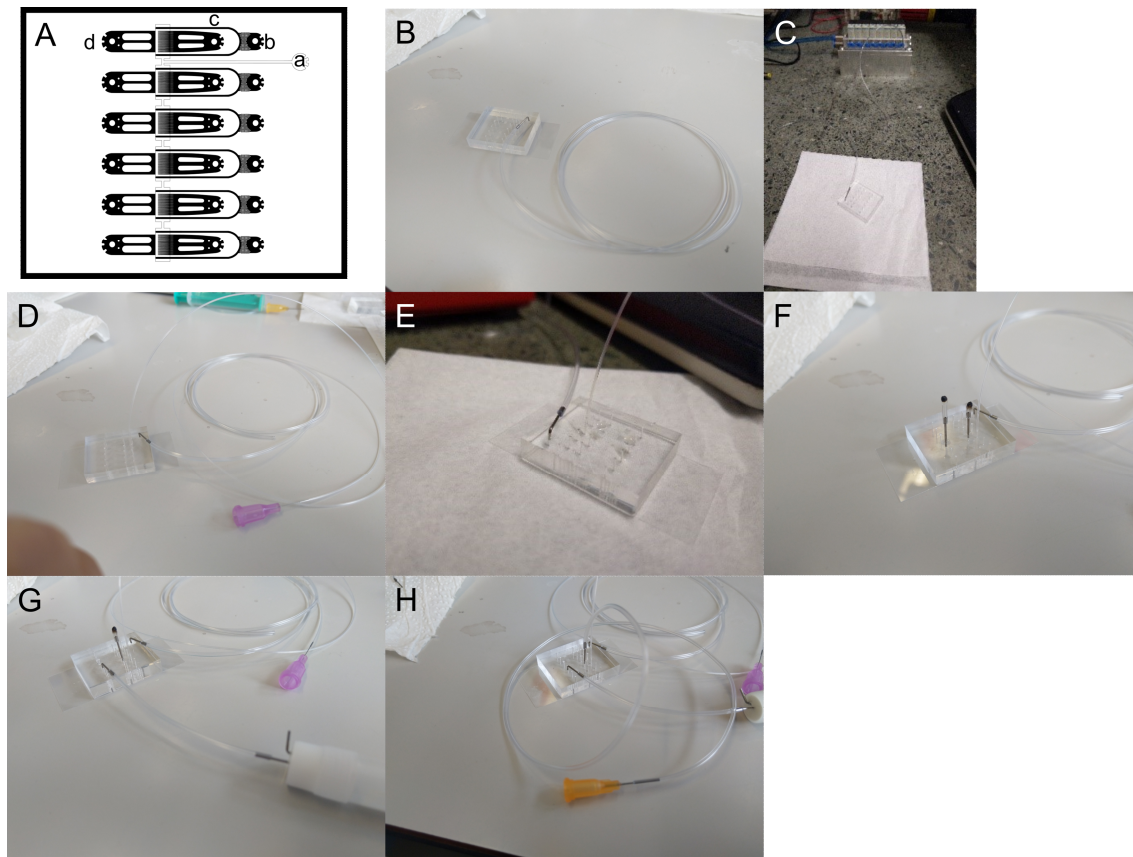

**Fig. S2. Device Preparation.** (A) Schematic device layout. (a) Valve inlet. (b) Food inlet. (c) Worm inlet. (d) Common outlet. (B) Connect 1/16" tubing filled with water to (a) using a hollow steel pin. (C) Fill on-chip hydraulic valve using the off-chip solenoid (background). Pressurize device for a few minutes. (D) Connect syringe with bacteria food to (b) using a piece of 1/32" tubing and a 30G blunt needle. (E) Fill device with bacteria food until liquid appears on both open connections. (F) Plug (c) and (d) using steel pins blocked with a piece of 1/16" tubing and pressurize the device using the food syringe and its pump. (G) Remove the plug from (D) and connect the waste container using a short piece of 1/16" tubing and a hollow steel pin. (H) Remove the plug from (c) and connect a buffer-filled syringe to the device using a hollow steel pin and 23G blunt needle. Prior to connecting the tubing draw worms into the tubing and connect the tubing to the device without introducing air into the system



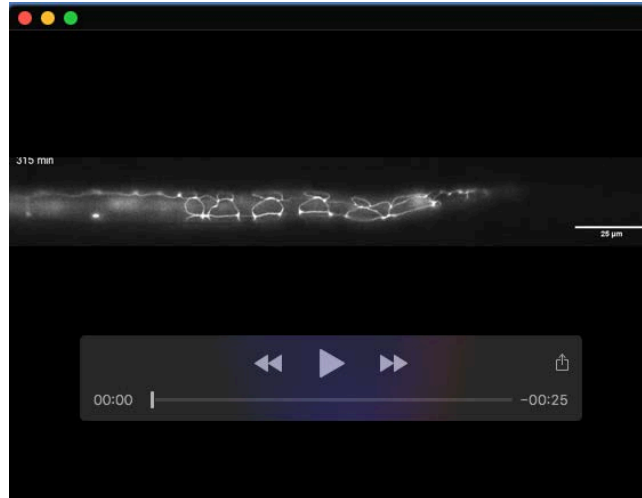

**Movie 1.** Merged view of two 3D projections of the *C. elegans* vulva during mid L4 stage. Left: epifluorescence images cropped and displayed in unprocessed form. Right: the same stack after deconvolution. Features are outlined using the HMR-1::GFP marker (left and right), and the mCherry::moeABD (right, outlining the AC).

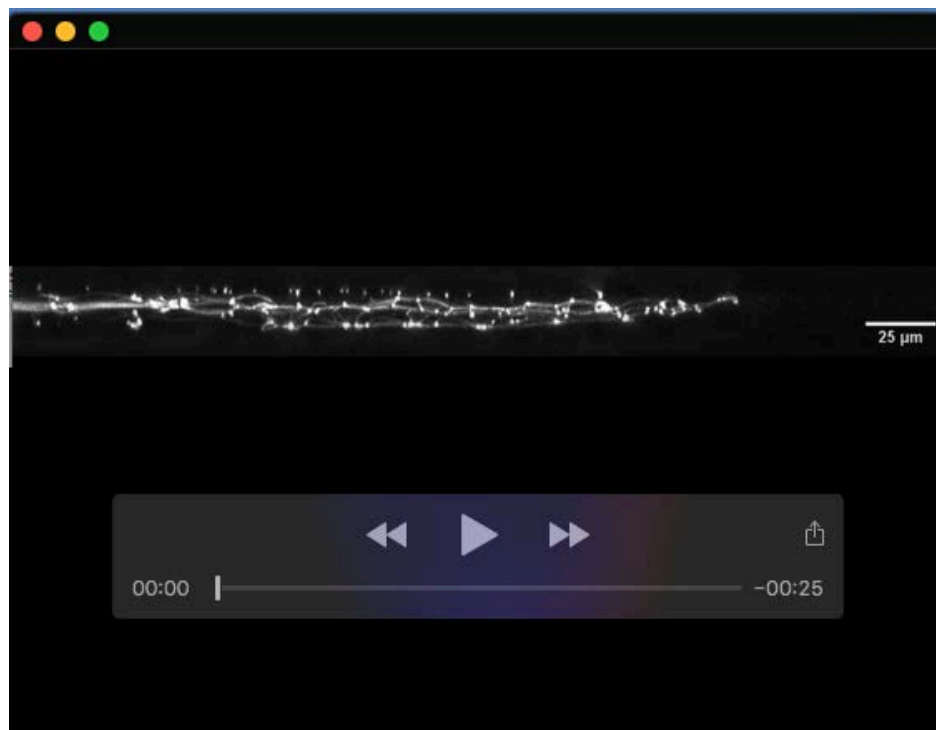

**Movie 2.** A single *C. elegans* larva developing from overnight starvation up to the early L2 stage. Displayed are maximum intensity projected epifluorescence images (total height of projection is 1.5 μm), in otherwise unprocessed format. Visible are both seam cell division and fusion as well as P-cell migration toward the ventral midline and division. Features are outlined using the DLG-1::GFP marker at 15-minute intervals for a total of 25 hours.

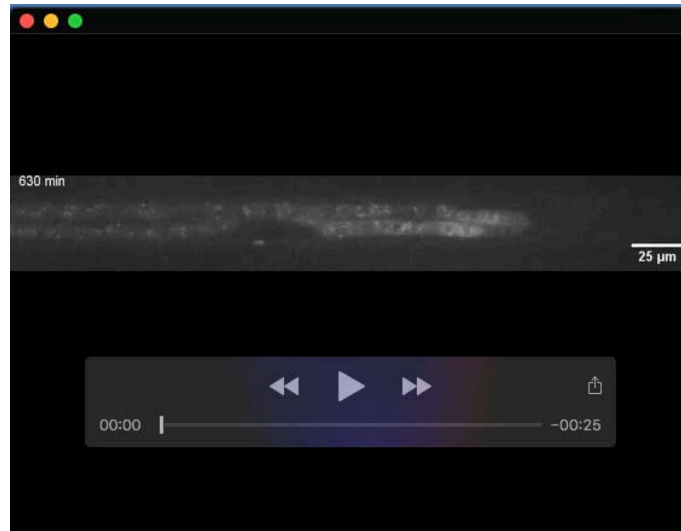

**Movie 3.** 3D projection of an L1 larvae mid stage. Epifluorescence images deconvolved and brightest points projected along the worm axis. Visible are various seam cells during division and fusion as well the P-cells still attached to the neighboring seam cells, prior to migration. Features are outlined using the DLG-1::GFP marker.

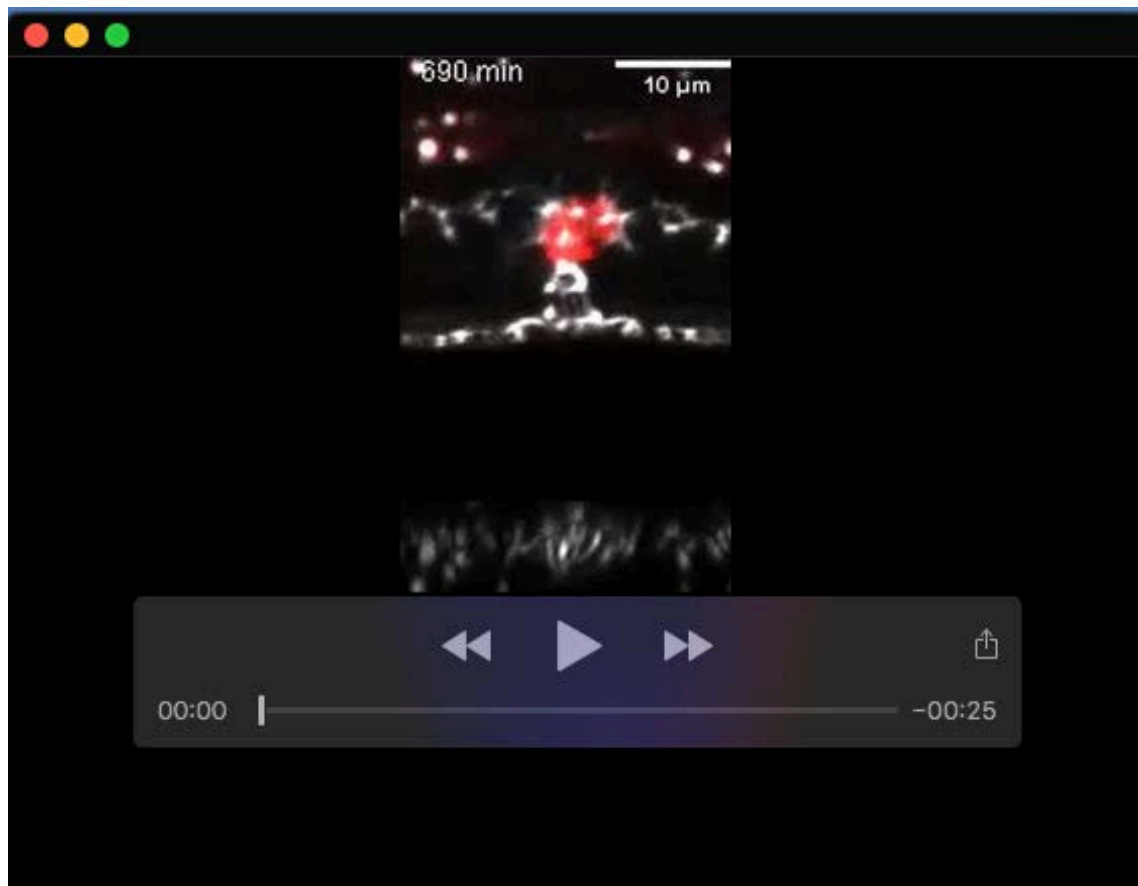

**Movie 4.** A single larva developing from late L1 stage up to early L4 stage (beginning vulval invagination). Only 1° vulval cells are expressing the EGL-17::CFP marker. In early L2 (approximately 400 minutes), EGL-17::CFP fluorescence manifests in P6.p, continually increasing in intensity. During L3, the 1° fated VPC undergoes two consecutive rounds of division, forming the 1 cell, 2 cell and 4 cell stage of vulva development. All motion visible results from growth as well as slight linear motion still possible on-chip, all of which can easily be removed through image registration. Images are shown at 30-minute intervals for a total of 34 hours.

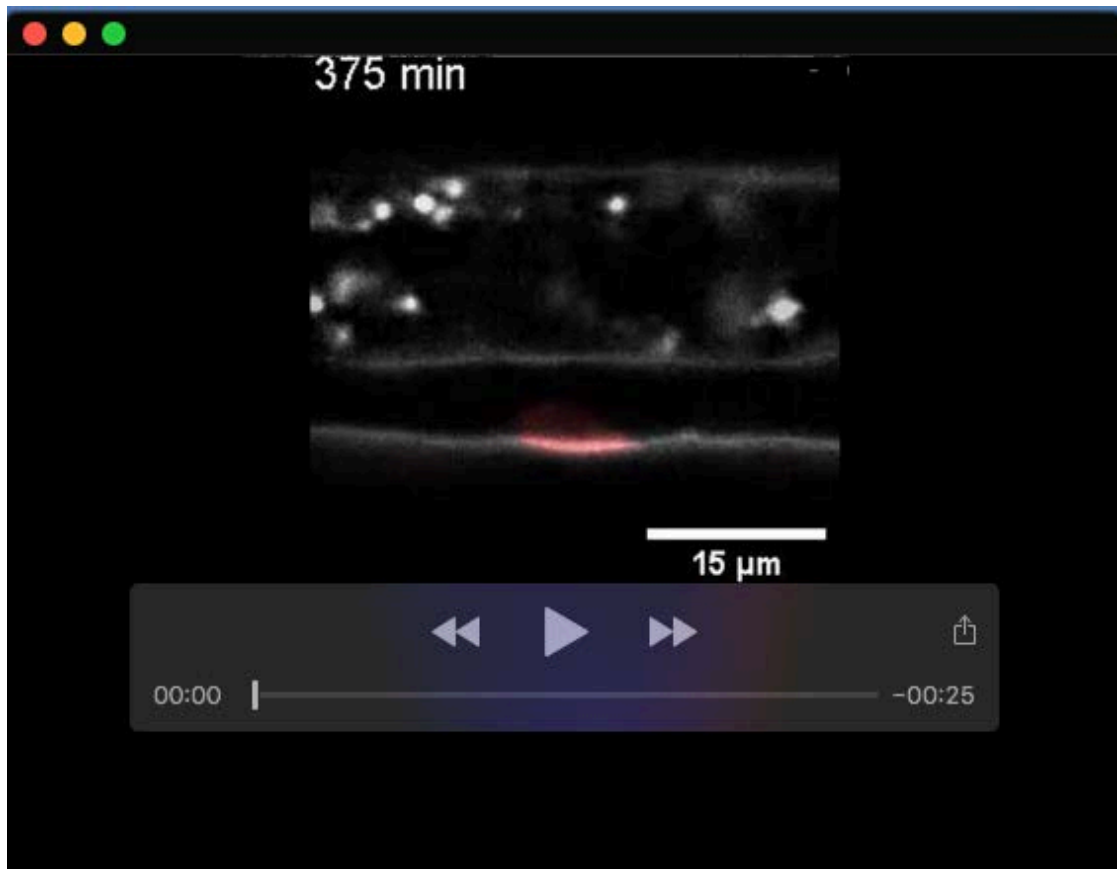

**Movie 5.** Top view: Z-projection of the developing vulva from the L3 stage up to the L4/adult transition. Bottom view: X-projection of the same vulva over time. Both views show the initial division of the VPCs followed by invagination, formation and enlargement of the toroids followed by collapse during eversion. Epifluorescence images displayed after cropping, deconvolution, registration and projection. Features are outlined through the HMR-1::GFP marker (hypodermis and VPCs) and the mCherry::moeABD marker (outlining the AC).

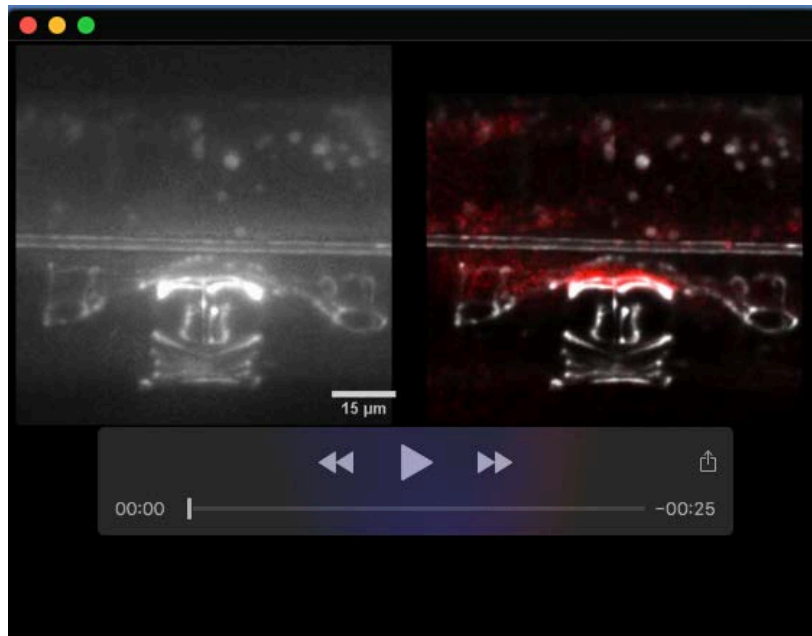

**Movie 6.** AC invasion in a control animal from L3 to the mid L4 stage. Evident are AC polarization prior to breaching. Features are outlined using the LAM-1::GFP and PIP-2::mCherry marker visualizing the basement membranes and AC respectively. Cropped and deconvolved images shown at 15-minute intervals.

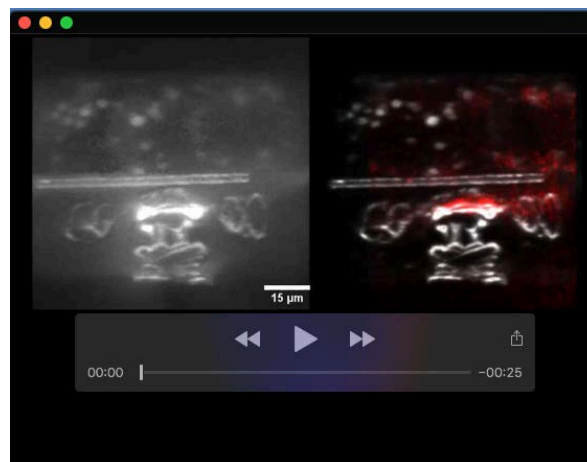

**Movie 7.** AC invasion in an animal treated with *egl-43* RNAi. Evident are multiple ACs, as well as mislocalization of the AC and absence of BM breaching. Features are outlined using the LAM-1::GFP and PIP-2::mCherry marker visualizing the basement membranes and AC respectively. Cropped and deconvolved images shown at 15-minute intervals.

## Supplementary Materials and Methods

**Food.dxf** CAD file for the food distribution structure. This structure is the same in all device types and is fabricated first. Once exposed and hardened the structures outlined by this mask are developed and the second layer is spincoated. Note the crosshairs along the midline of the mask, which serve as alignment marker for the following mask. During alignment, make sure there is sufficient overlap between the food channel and the second structure (top and bottom). Overlap on the worm side should not be too large to avoid worms slipping from one channel into the neighboring one, but also not too small to allow sufficient access to food. Aim is an overlap of 20-35µm.

[Click here to Download Supplementary file 1](#)

**L1.dxf** CAD file for the L1 device. Four devices with six independent functional units are formed. Note the windows along the midline of the mask, which serve as alignment marker for the following mask. During alignment, the sample is viewed through the window in this mask and the crosshair formed by the previous mask is placed at the center of the windows formed here.

[Click here to Download Supplementary file 2](#)

**L1-L4.dxf** CAD file for the L1-L4 device. Four devices with six independent functional units are formed. Note the windows along the midline of the mask, which serve as alignment marker for the following mask. During alignment, the sample is viewed through the window in this mask and the crosshair formed by the previous mask is placed at the center of the windows formed here.

[Click here to Download Supplementary file 3](#)

**L2-A.dxf** CAD file for the L2-A device. Four devices with six independent functional units are formed. Note the windows along the midline of the mask, which serve as alignment marker for the following mask. During alignment, the sample is viewed through the window in this mask and the crosshair formed by the previous mask is placed at the center of the windows formed here.

[Click here to Download Supplementary file 4](#)

Valve.dxf      CAD file for the valve layer.

[Click here to Download Supplementary file 5](#)

## Extended methods with detailed step-by-step protocols

### Device Fabrication.

Microfluidic devices for all developmental stages were made from silicon wafers (Si-Wafer 4P0/>1/525±25/SSP/TTV<10, Siegert Wafer, Germany) patterned with SU8 photoresist, following standard protocols protocols (Xia *et al.* 1998). Briefly, in a first step wafers were cleaned with an air plasma (Diener electronic) followed by spin-coating (WS-650-23B, Laurell) the low height, food supply layer, using a low viscosity SU8 (GM1050, Gersteltec). The height of this layer was chosen to be between 3-5µm, high enough for bacteria to pass but low enough for worms to be blocked from entering. This layer was baked and patterned using a first photomask (high-resolution film mask, Microlitho), followed by post-baking and development. In a second step, the higher SU8 layer (8 to 15 µm) was created (GM1050/1060, Gersteltec) baked and exposed through a second photomask. Features created by the first and second mask were aligned using a mask aligner (UV KUB3, Kloe). Following exposure, wafers were post-baked and developed resulting in the final master mold. Prior to use the wafer was baked at 200°C for 10 minutes, resulting in a smooth surface and higher long-term stability of the features. The hard-baked was then treated with chlorotrimethyl silane vapor (Sigma) to passivate the surface.

For device fabrication (Unger *et al.* 2000) the finished master mold was spin-coated with a thin layer of PDMS (spin-coated @750rpm, PDMS Elastasil RT601 A/B, ratio 20:1), while a second batch of PDMS (ratio 5:1) was cast on the master mold with the valve structure (approximately 5mm thick). This master mold was fabricated and treated as described above, however with only a single height layer of SU8. The PDMS on the valve layer was then degassed under vacuum and placed in an oven at 70°C along with the spin-coated device layer. After approximately 15 minutes both PDMS pieces were removed from the oven, the valve layer was carefully removed from the master mold, cut to size and a single access hole punched for each valve structure (G20 puncher, Syneo). The cut PDMS pieces were then aligned to the thin device layer using a stereomicroscope. The two pieces were carefully brought into contact, ensuring proper positioning of the valve on the device and removal of any trapped air. The assembled devices were then placed back into the oven and baked overnight. Following overnight baking, the valve layer and device layer were permanently bonded to one another. At this point all devices are carefully peeled off the master



mold. All access holes were punched (G20 puncher, Syneo) and devices bonded to cover glass (#41014551, Glaswarenfabrik Karl Hecht) using an air plasma (Zepto, Diener electronic).

### Step-by-step protocol

1. Clean wafers using air plasma.
2. Spincoat first SU8 layer, followed by soft-bake at 95°C.
3. Expose first layer, followed by post-bake at 95°C and development.
4. Repeat plasma cleaning after wafer is developed and dry.
5. Spincoat second SU8 layer followed by soft bake at 95°C (if necessary first bake at 65°C).
6. Expose second layer after carefully aligning the second mask to the existing features using alignment markers on either side of the wafer.
7. Post-bake and develop the wafer, followed by hard-bake at 200°C.
8. Treat wafer with chlorotrimethyl silane for at least 2 hours (NOTE: The silanes is toxic and releases corrosive vapors. This step therefore needs to be performed in a fume hood).
9. Prepare a batch of 20g PDMS pre-polymer (Elastosil RT601 part A) and thoroughly mix it with the 1g of crosslinker (ratio 20:1, Elastosil RT601 part B). Ideally mixing is performed using a planetary centrifugal mixer (FlackTek Speedmixer) or if not available by hand using a plastic spatula or glass rod.
10. Remove 2mL of the mixed PDMS using a syringe (note if mixed by hand the PDMS should be degassed prior to removing the necessary part or PDMS should be prepared in a smaller 1-5g batch ratio 20:1).
11. Add another 3.75g of crosslinker (final ratio approx. 5:1).
12. Using the batch of 20:1 PDMS spin coat the device wafer at 750rpm for 30 seconds.
13. Simultaneously place the valve wafer in an aluminium dish and cast the 5:1 PDMS onto it. Degas the device wafer for about 10 minutes and after degassing break all remaining bubbles using pipette.
14. Bake device and valve layer for 15 minutes at 70°C.

15. Check if device and valve layer are cured sufficiently by poking them with a pipette tip or tweezers. The valve layer should be solid and the device layer should be slightly tacky.
16. Remove the valve layer and cut it to size using a scalpel or razor blade.
17. Punch the access hole to the valve channel.
18. Place the device wafer on a stereomicroscope equipped with top illumination.
19. Gently place the PDMS piece with the valve layer onto the device wafer.
20. Align valve and device features and remove all trapped air from in between the layers.
21. Place assembled device back in the oven at 70°C overnight.
22. Remove the device from the wafer.
23. Punch all remaining access holes.
24. Bond the PDMS to a cover glass using air plasma and place bonded device in the oven at 70°C for a few hours.

### **Worm Preparation**

Worms were bleached from mixed plates, with embryos left to hatch overnight in buffer (M9 or S-Basal). Once hatched worms were filtered through a 10µm cell strainer (#43-10010-50, pluriSelect) to remove all unhatched eggs, as well as debris from the plate or leftover corpses. The L1 larvae were centrifuged at 1300 rcf (in 15mL Falcone tubes) to remove supernatant and washed with 5 mL of clean buffer. Centrifugation was then repeated, supernatant removed and worms transferred to a plate seeded with OP50 if worms older than L1 stage are needed. L1 stage worms can be loaded onto the device right after preparation. Otherwise, once the worms have reached the desired age, they were washed off the plate using S-Basal and left to sediment. The supernatant was then removed and worms washed three times using fresh buffer. Once washed worms were left to sediment, with as much of the supernatant as possible being removed.

### **Step-by-step protocol**

1. Starting from plates with many gravid animals.
2. Wash animals of plate using M9 or S-Basal buffer.
3. Add 5% NaClO and 5M NaOH to the worm suspension (200uL/100uL for every 1mL of worm suspension).

4. Gently shake bleaching mix until animals begin to break apart.
5. Centrifuge bleaching mix at 1300 rcf for 1 min.
6. Remove supernatant and add an equal amount of fresh buffer.
7. Again centrifuge at 1300 rcf for 1 min.
8. Remove the supernatant and transfer the pelleted worms to a 15mL tube with 5mL of fresh buffer.
9. Shake overnight at 20°C.
10. Filter the worm suspension through a 10µm cell strainer.
11. Centrifuge worm suspension at 1300 rcf for 1 min.
12. Remove supernatant and resuspend worms in an equal amount of buffer.
13. Centrifuge worm mixture again at 1300 rcf for 1 min.
14. Remove supernatant and transfer worms to NGM plates or if L1 larvae are desired, use them right away.
15. Once worms reach desired age, wash them of the plate using fresh S-Basal.
16. Leave worms to sediment by gravity or pellet by centrifugation at 750 rcf.
17. Remove supernatant and add an equal amount of fresh buffer.
18. Repeat sedimentation of centrifugation step.
19. Remove supernatant and add an equal amount of fresh buffer.
20. Repeat sedimentation of centrifugation step for a final time.
21. Remove most of the supernatant.
22. Leave worms in the tube until the experiment starts.

### **Bacteria preparation**

8x5mL of LBroth was prepared in 15mL Falcone tubes, with each tube being inoculated with 0.1mL of NA22 stock (NA22 rather than OP50, as NA22 can be prepared at higher concentrations without clumping. Bacteria were left to grow overnight at 37°C whilst shaking. After growth, the bacteria were centrifuged at 3000 rcf for 2 minutes. The supernatant was then decanted and bacteria re-suspended in 1mL of clean S-Basal (1mL per tube). All tubes were then combined, the centrifugation repeated and three washes performed. Finally all bacteria were centrifuged, decanting as much of the supernatant as possible and re-suspended in 1mL of S-Basal. The concentrated bacteria suspension was mixed with 0.65mL of Optiprep (density matching to prevent

bacteria from segregating), 0.332mL of S-Basal+1% Pluronic F127. All components were then vortexed and passed through a 10 $\mu$ m cell strainer to remove bacteria clumps formed during the preparation.

### Step-by-step protocol

1. Prepare 40mL of LBroth, either as 8x5mL in Falcone tubes or in larger tubes, sterile Erlenmeyer flasks etc.
2. Inoculate LB with 0.1mL of saturated bacteria culture per every 5mL of culture.
3. Grow bacteria while shaking overnight at 37°C.
4. Centrifuge bacteria at 3000 rcf for 2 min.
5. Remove supernatant and add 1mL of fresh buffer to each tube. Combining all tubes into one.
6. Mechanically resuspend bacteria using a pipette.
7. Centrifuge bacteria at 3000 rcf for 2 min.
8. Remove supernatant and again add 2mL of fresh buffer.
9. Mechanically resuspend bacteria using a pipette.
10. Centrifuge bacteria at 3000 rcf for 2 min for a final time.
11. Remove as much of the supernatant as possible and add 1mL of fresh buffer before mechanically resuspending all bacteria.
12. Combine 0.65mL Optiprep, 0.332mL S-Basal+Pluronic F127 with 1mL of bacteria suspension.
13. Mix the food preparation using a vortex mixer.
14. Filter the food through a 10 $\mu$ m cell strainer.

### Setup Preparation

For the long-term imaging experiments described above, the system needs to be equipped with a pressure supply and regulator to adjust the pressure exerted on trapped animals by the active on-chip valve. This pressure source must be connected to the off-chip solenoid valve using a sufficient length of tubing and a precision pressure regulator (needed for fine-tuning of the system pressure and stability). The solenoid valve is interfaced to the microfluidic device using a thinner 1/16" tubing. Lastly, the system must be able to actively switch the on-chip valve. The valve is switched

on 10 seconds before image acquisition, remains active throughout image acquisition and is switched off once all images at a specific time point are acquired. Such active control may be achieved using an Arduino microcontroller and a relay or MOSFET, or in more advanced imaging systems may be integrated with a laser launcher or other DAq card.

- 3/2 solenoid valve (#MH1-A-24VDC-C-HC-V-PS, Festo)
- OD. 6 mm polyurethane tubing (enough to span from the pressure supply to the microscope).
- Precision pressure regulator, 1/4" ports, 2-60psi range, (McMaster #6162K13).
- Pressure gauge, 1/4" connection, 0-60psi range (McMaster #4089K81).
- 2x 1/4" push-in fitting to 1/4" male NPT (McMaster #5111K82).
- 

### Chip preparation

Refer to Figure 1 and S1. The on-chip hydraulic valve is filled. A long piece of 1/16" tubing (#0642002, Tygon tubing 1/16", Fisher Scientific) is connected to a 1mL plastic syringe filled with DI water using a blunt needle (#300-35-970, Distrelec), and attached to a microbore steel pin bent at the tip (the pin may be removed from 23G blunt needle). The tubing is connected to the hydraulic valve inlet using the steel pin (**Fig. S2B**). Once connected, the syringe and blunt needle are detached from the tubing and the tubing connected to the valve manifold. The device is pressurized for several minutes until the clamp valve is completely filled with water (1bar pressure) (**Fig. S2C**). Once the valve is filled the pressure is turned off. Next, the device is filled with the bacteria suspension. A long piece of 1/32" tubing (#0641900, Tygon tubing 1/32", Fisher Scientific) is connected to a 1mL syringe filled with the bacteria food suspension using a 30G blunt needle (#300-35-970, Distrelec) (making sure no air remains in the syringe, needle or tubing). Food is delivered to the chip via the food inlet (**Fig. S2D**), and the device filled with food by gently applying pressure on the syringe plunger, until a drop of liquid appears on each open connection (**Fig. S2E**). All open connections are plugged with a blocked steel pin (attach a small piece of 1/16" tubing to a steel pin and burn the end to block it) and more pressure applied to the syringe plunger to remove all air bubbles from the device (**Fig. S2F**). To apply pressure, the setscrew on the back of the syringe pump may be used. Once all air is removed, the blocked steel pins can be

carefully removed and the waste container connected. The waste container is fabricated by gluing several steel pins into the lid of a cryovial and connected to the device using a short piece of 1/16" tubing and a steel pin (bent 90°) (**Fig. S2G**).

Finally, worms are loaded into the device. Another piece of 1/16" tubing is connected to a 1mL syringe filled with fresh S-Basal using a blunt needle and steel pin (23G, straight, making sure no air remains in syringe, needle or tubing). The tubing is filled with buffer, and worms "sucked" into the tubing using the syringe. The tubing is connected to the remaining open connection (**Fig. S2H**). Here, a drop of liquid (food) is carefully pushed onto the chip inlet and at the tip of the steel pin (worms). The pin is connected to the chip without introducing air into the device.

### Step-by-step protocol

1. Start by filling a syringe with DI water.
2. Attach a 23G needle and a long piece of 1/16" tubing terminated with a hollow steel pin (bent 90°).
3. Fill the tubing with DI water from the syringe and attach it to the valve inlet by pushing the steel pin into the punched hole.
4. Remove the syringe and needle and attach the tubing to the off-chip solenoid.
5. Using the imaging software turn on the solenoid and pressurize the device for several minutes to remove all air from the valve. Check by eye if process complete.
6. Switch off the solenoid.
7. Fill the filtered bacteria solution in a 1mL syringe (approx. 0.5mL of food are sufficient).
8. Attach a 30G needle and a long piece of 1/32" tubing to the needle.
9. Press on the plunger to fill the needle and the attached tubing, ensuring no air stays in the syringe or tubing.
10. Push the 1/32" tubing directly into the food inlet of the microfluidic device (use tweezers ensuring not to damage the tubing, recommended are SMD tweezers).
11. Place the syringe on the syringe pump.
12. Press on the syringe plunger using the mechanical setscrew at the back to fill the device with liquid. A drop of liquid should appear on each open connection.

13. Plug both the worm inlet and outlet with a blocked steel pin (steel pin with a short piece of 1/16" tubing attached and closed by burning).
14. Apply more pressure using the setscrew to remove all air from within the device.
15. Remove the blocked pin at the outlet and attach the waste container (made from a cryo vial or Eppendorf tube with two steel pins stuck through the lid and held in place by glue). The waste container is attached using a short piece of 1/16" tubing connected to the container on one side and to a hollow steel pin on the other side (bent 90°).
16. Push on the syringe to ensure the waste container is well connected, and no connections blocked.
17. Remove the second blocked steel pin.
18. Push on the syringe until a small drop of liquid appears at the worm inlet.
19. Attach a long piece of 1/16" tubing to a 1mL syringe filled with S-Basal buffer, using a 23G needle.
20. Attach a steel pin (straight) to the other end of the tubing.
21. Fill both needle and tubing with buffer from the syringe ensuring no air stays in the syringe or tubing.
22. Put the steel pin end of the tubing into the tube with worms.
23. Push out a small amount of liquid ensuring no air is left in the tubing.
24. Pull worms into the tubing. Note do not pull them into the syringe.
25. Push on the syringe connected to the worms until a small liquid drop appear on the steel pin.
26. Push the steel pin into the worm inlet.

### **Worm loading**

Worms are loaded into the device channels by gently applying pressure to the syringe plunger, filling as many channels as necessary. Statistically, about 50% of channels should have worms oriented with their head facing the food supply channel. This proportion can be further increased by carefully manipulating the worms while entering the channel. Worms naturally tend to swim against the flow that carries them into the device. For worms to be loaded in headfirst orientation the experimenter should gently push and pull on the worm syringe plunger and wait for animals to turn toward the trap channel. Once oriented correctly worms may be pushed into the device. The



pump supplying the bacteria suspension is alternately run at 1  $\mu\text{L}/\text{min}$  for 30 minutes and 50  $\mu\text{L}/\text{min}$  for 6 seconds, looping continuously throughout the experiment (programmable syringe pump Aladdin A11000-220, WPI).

## References

- Unger, M.A., Chou, H.P., Thorsen, T., Scherer, A. and Quake, S.R. (2000). Monolithic microfabricated valves and pumps by multilayer soft lithography. *Science*. **288**, 113-116.
- Xia, Y. and Whitesides, G.M. (1998). Soft lithography. Annual Review of Materials. *Science*. **28**, 153-184.
